# Supplementary material
Source: publisher figshare collection journal article supplement (https://acs.figshare.com/ndownloader/files/28730703)

# Death Star Occupancy

*1000 nm, 700 nm, 500 nm, 400 nm, 350 nm, 200 nm*

1000 nm

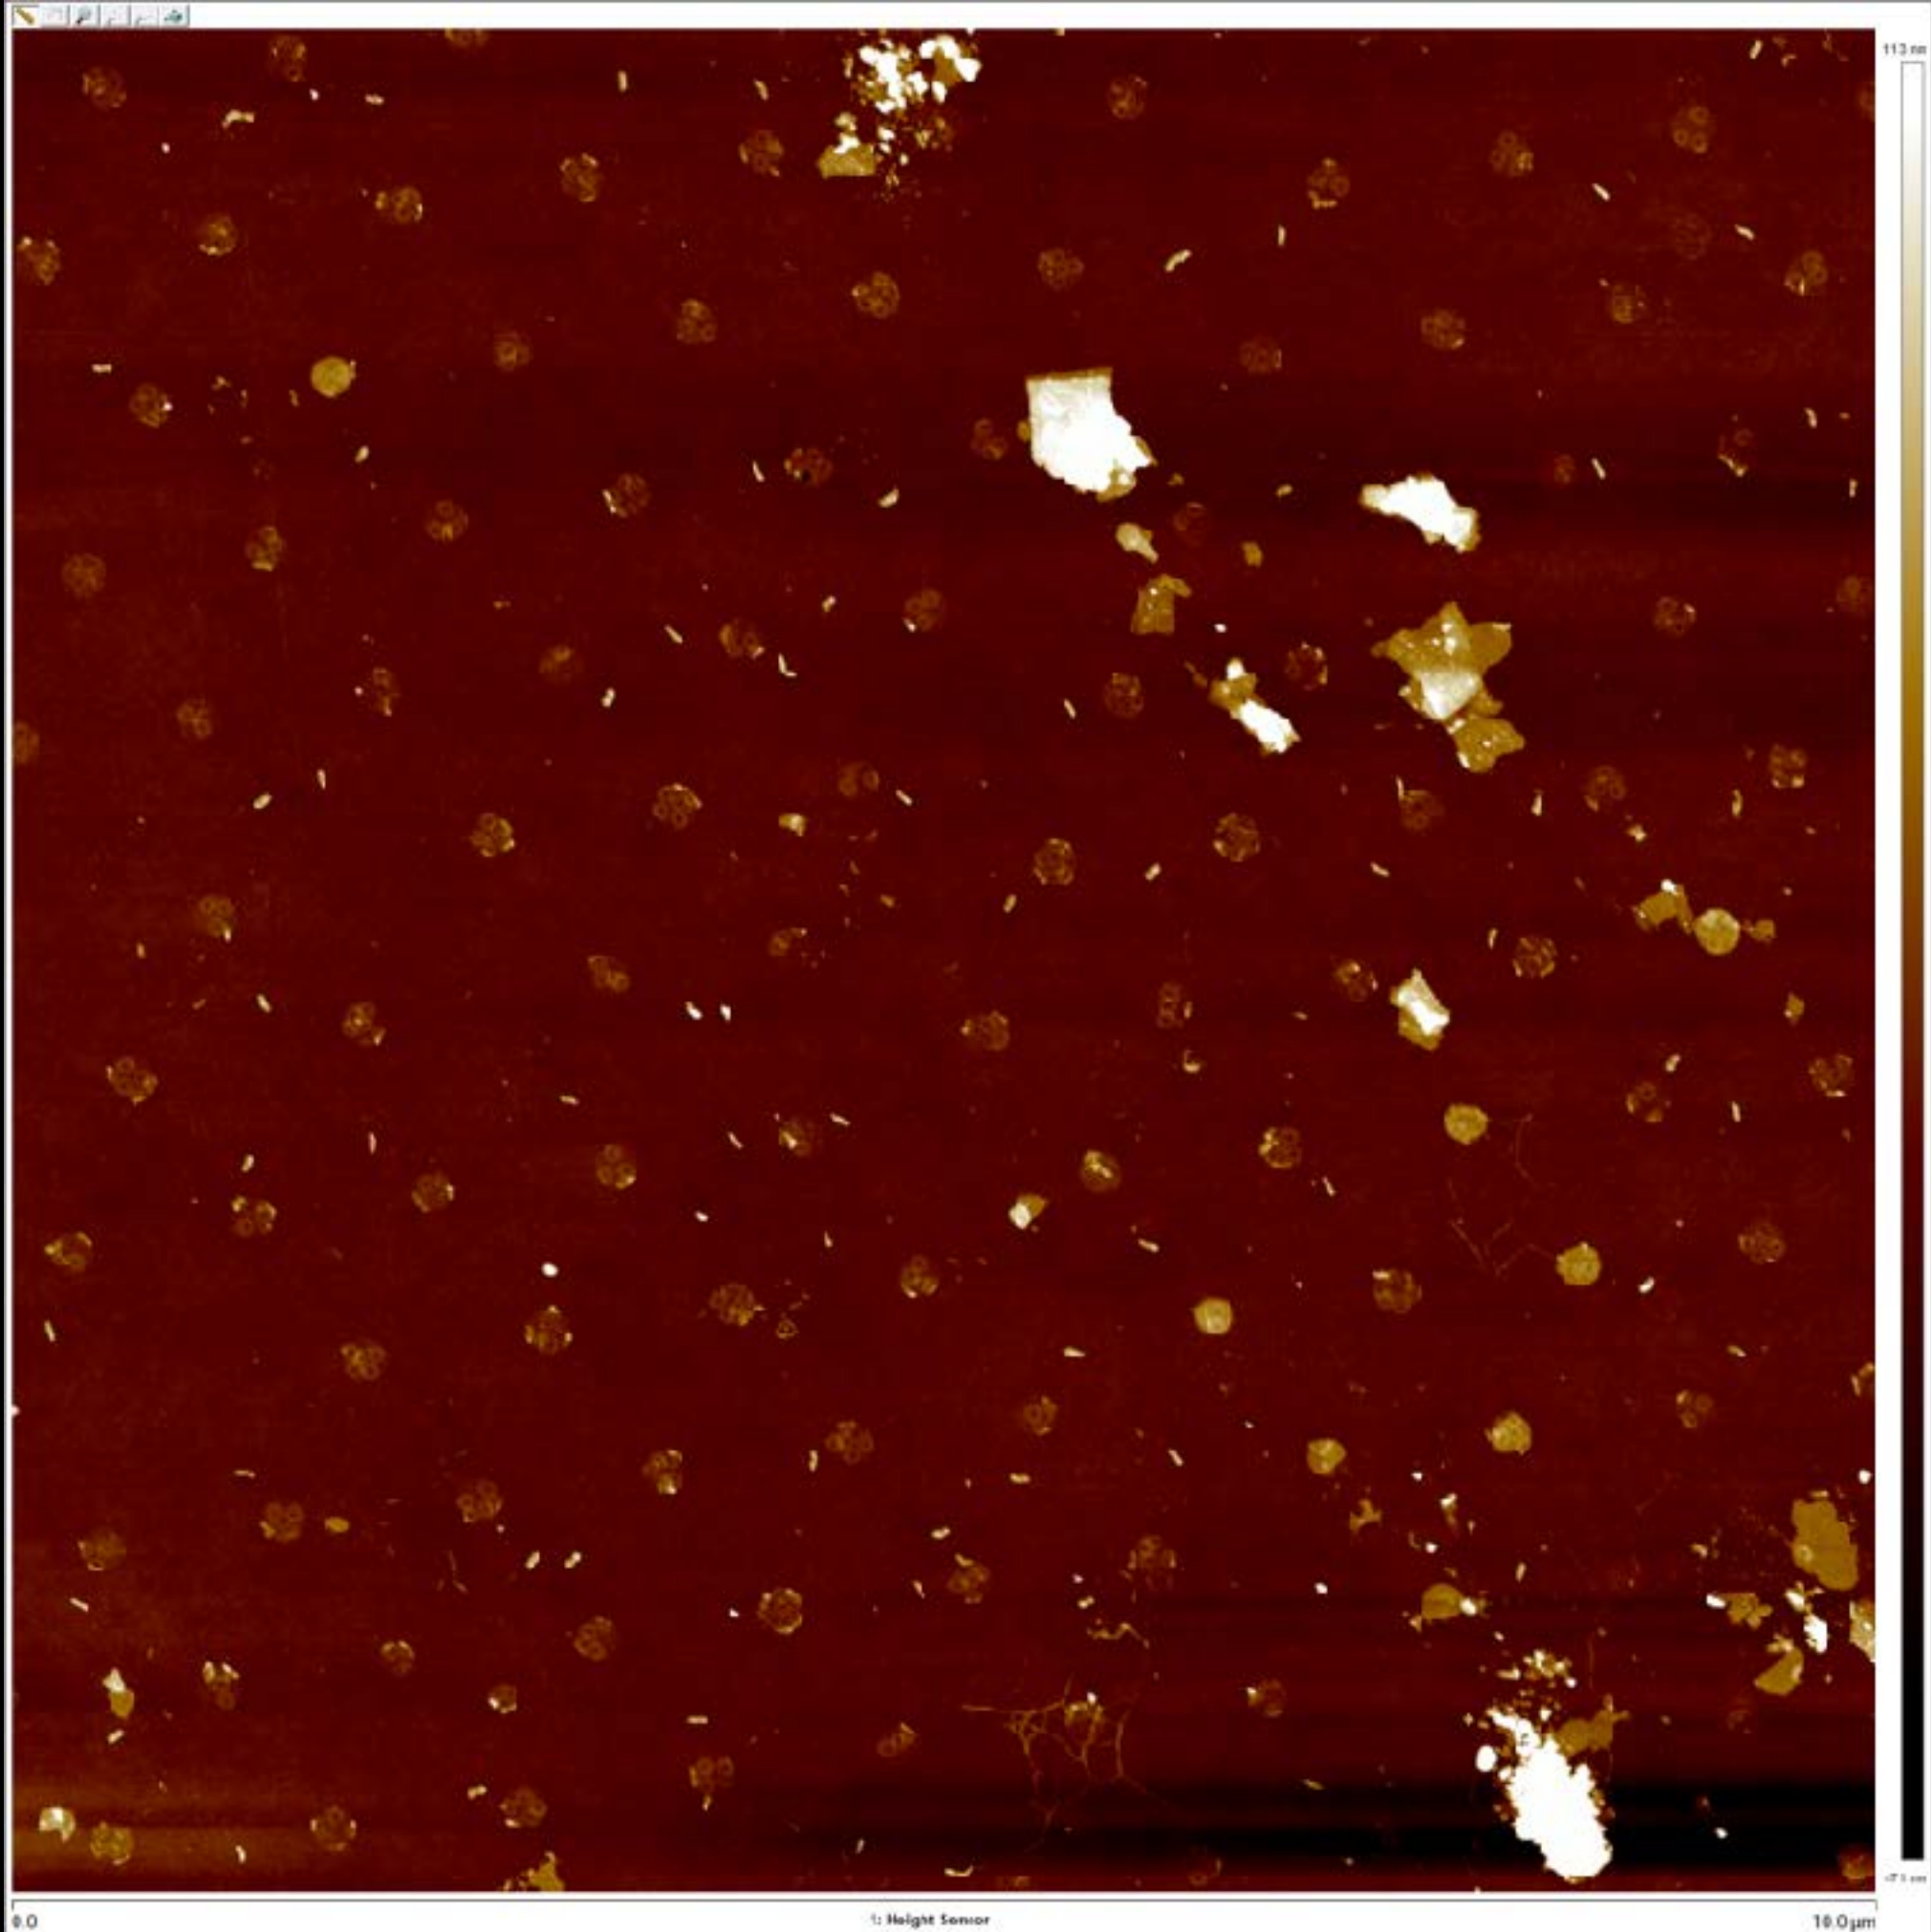



1000 nm

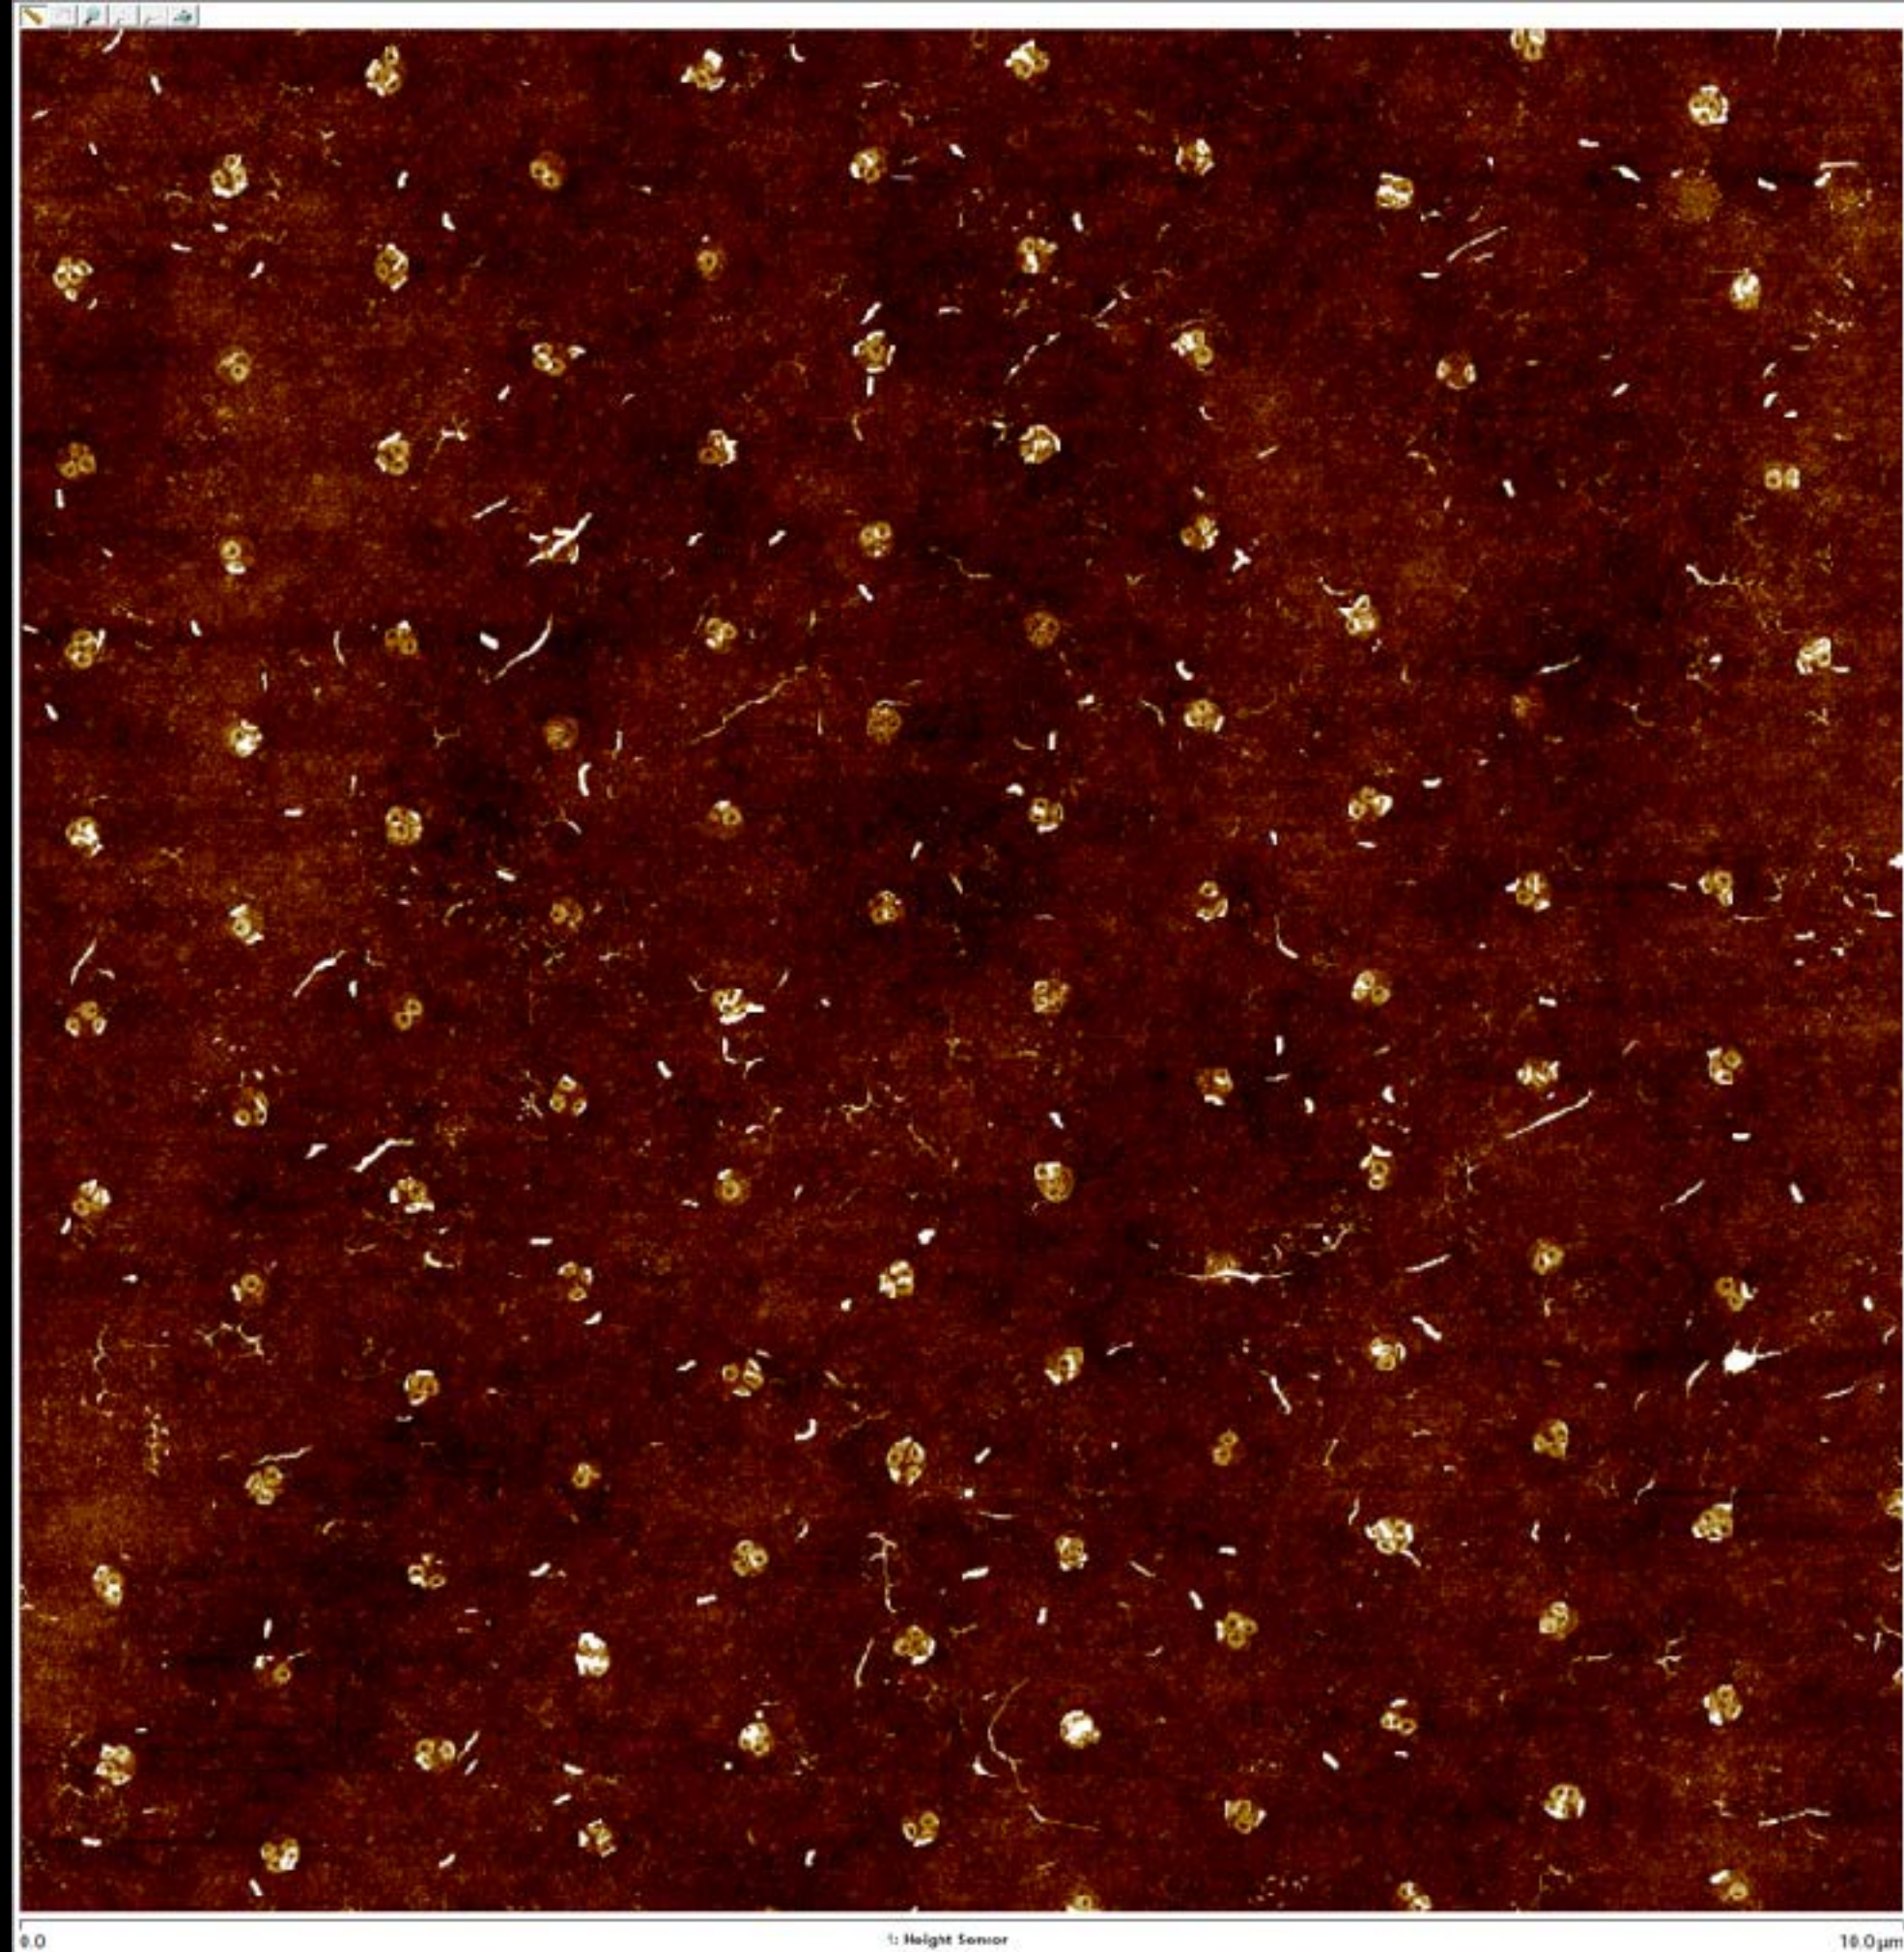



1000 nm

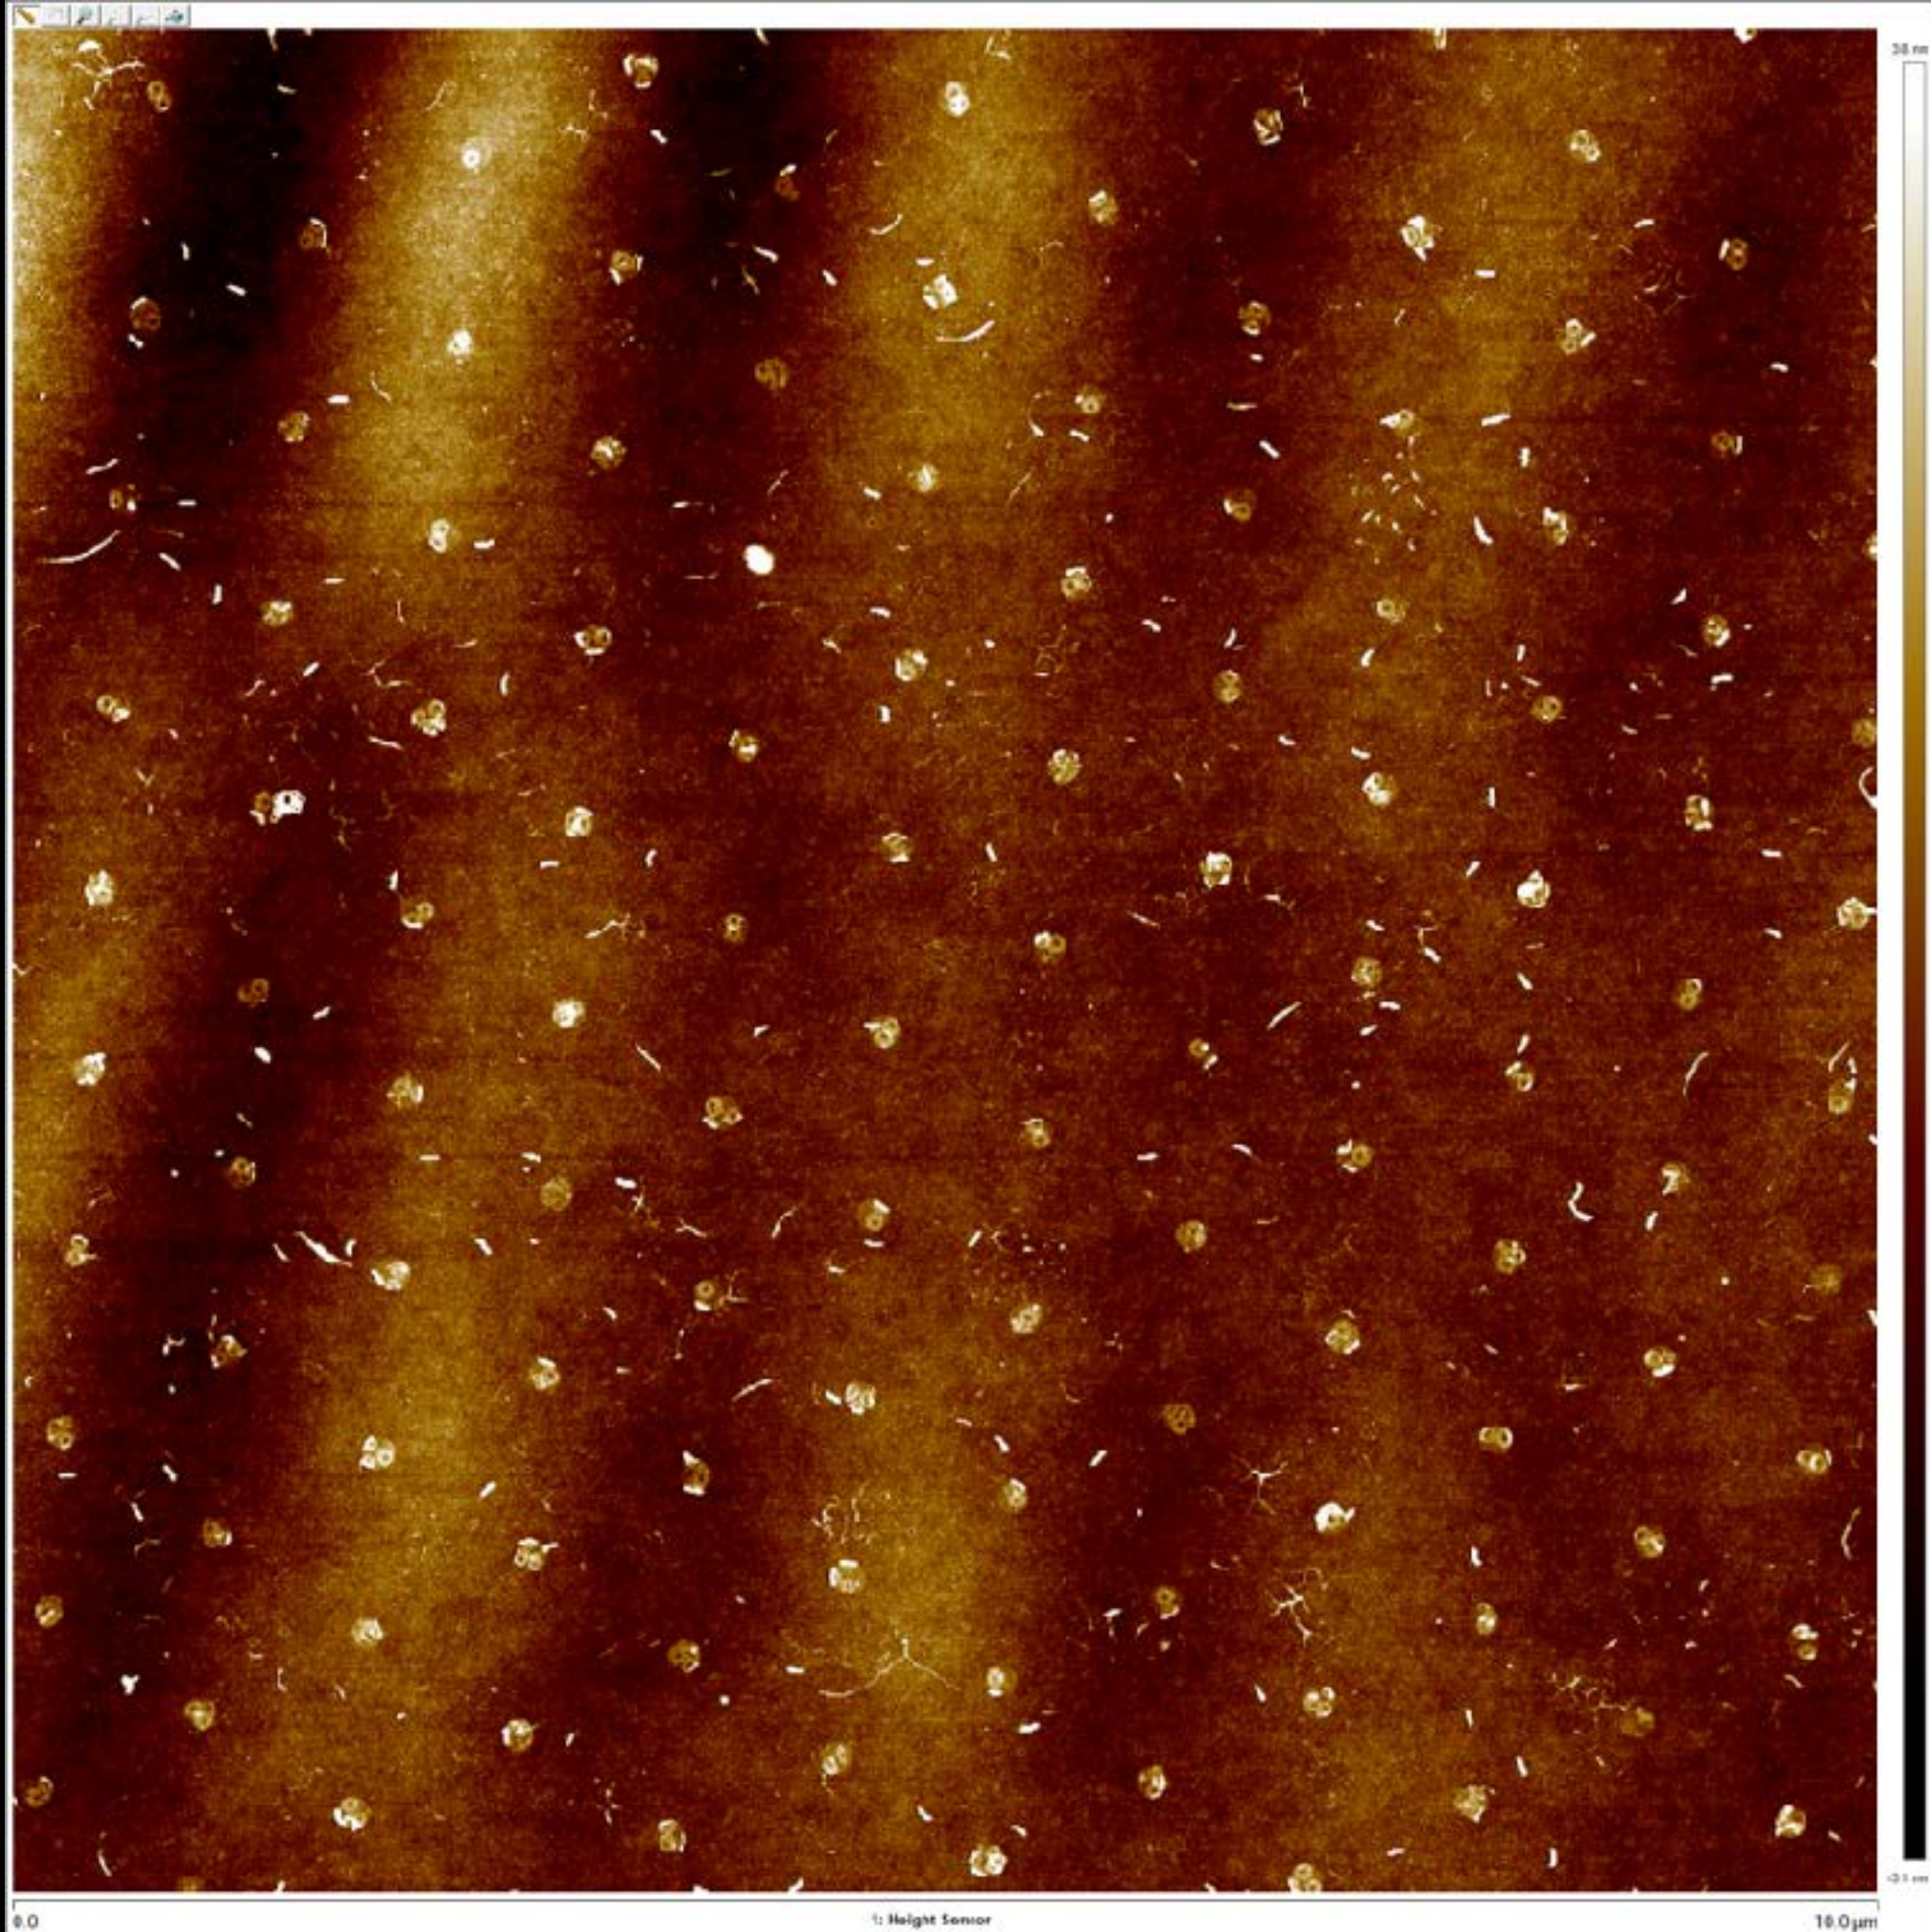



1000 nm

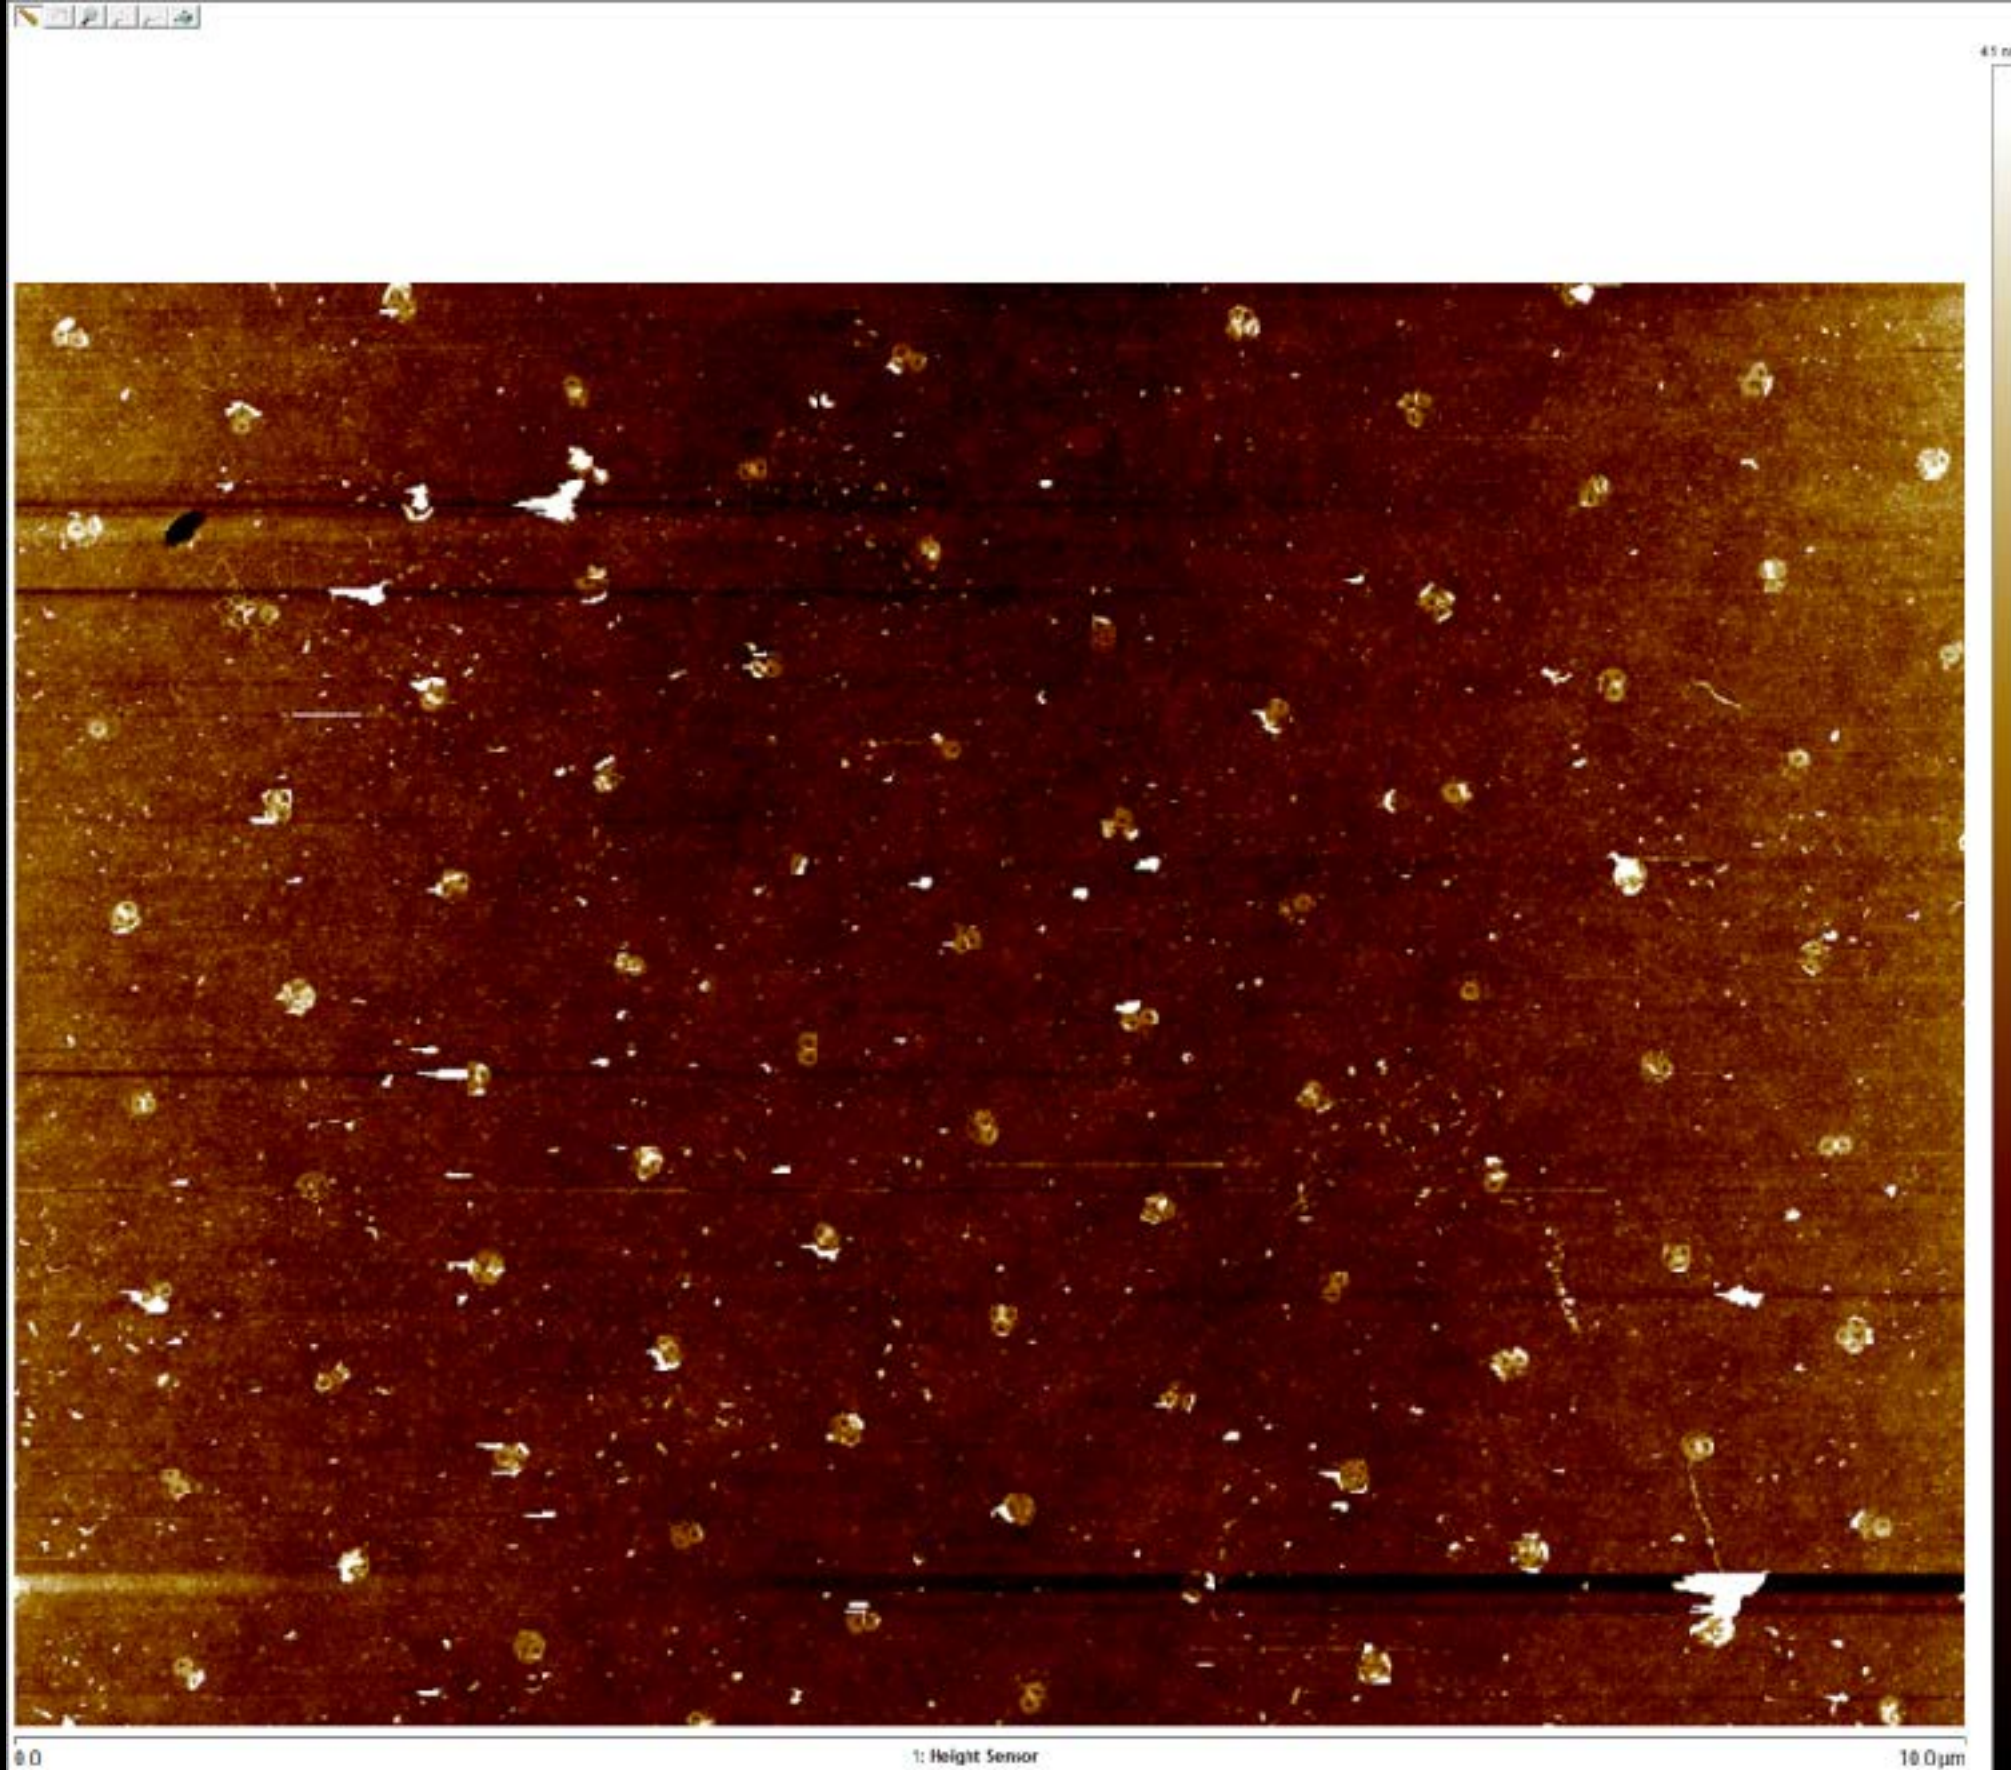



700 nm

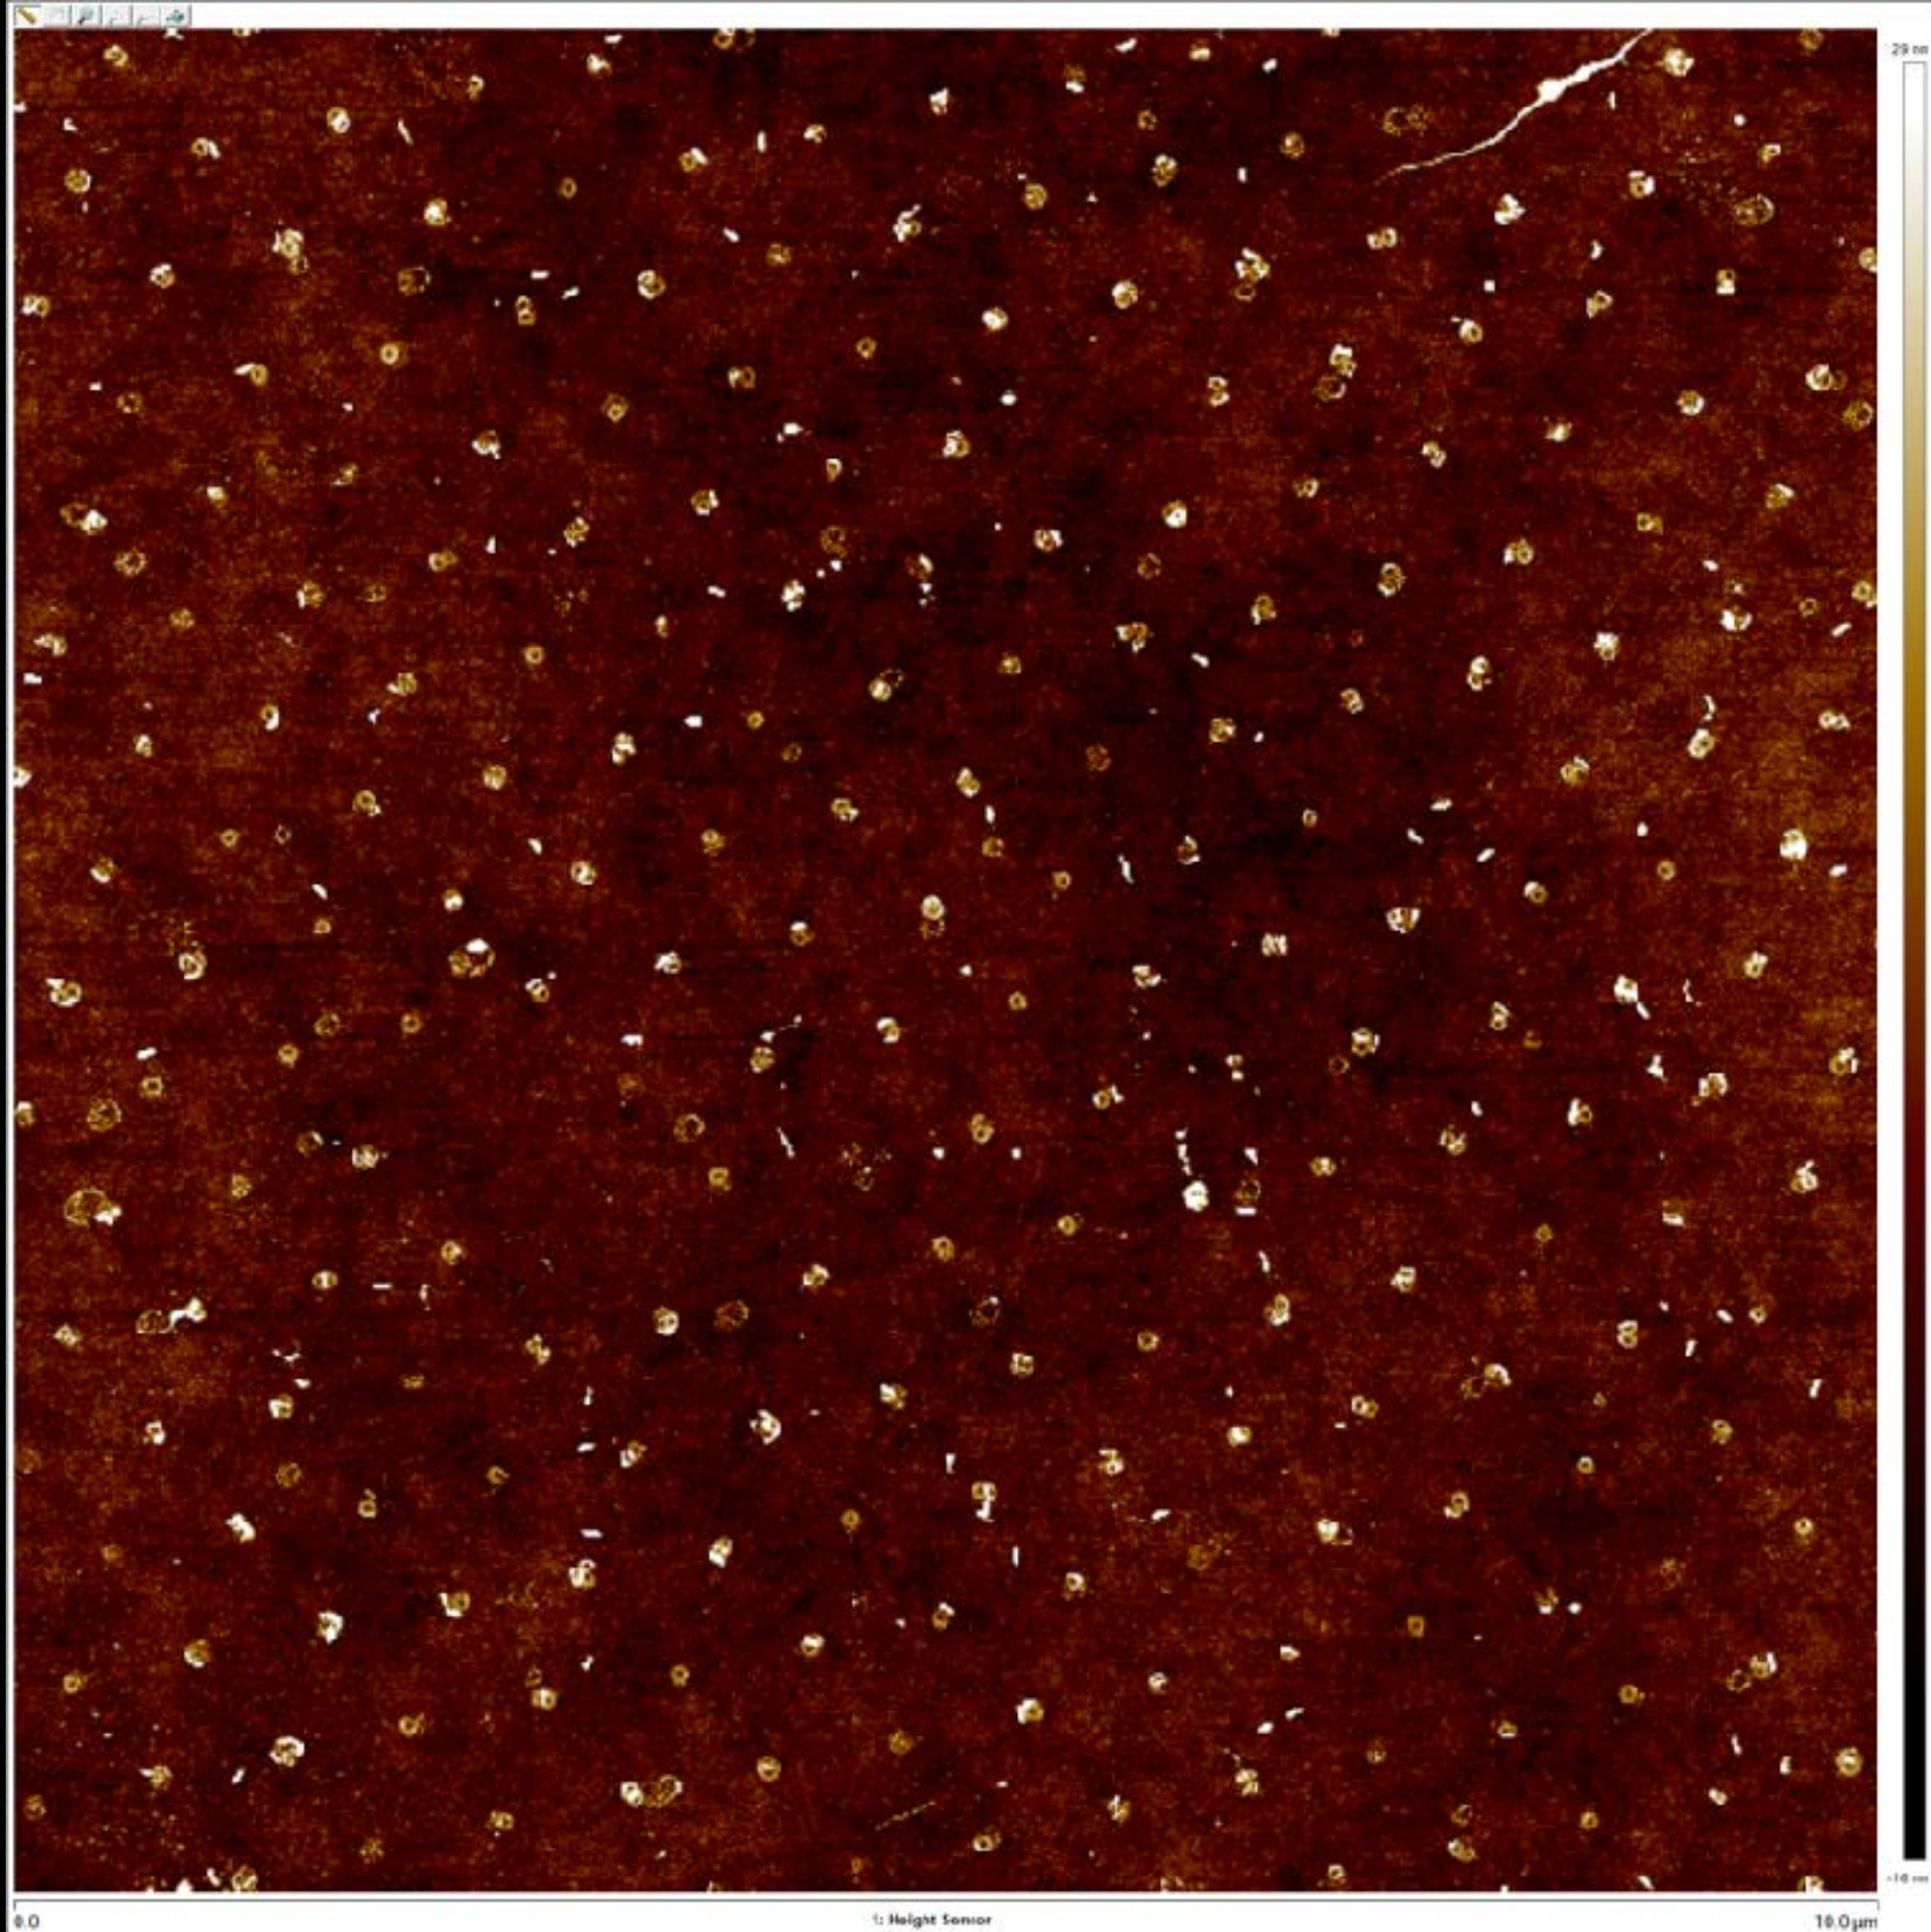



700 nm

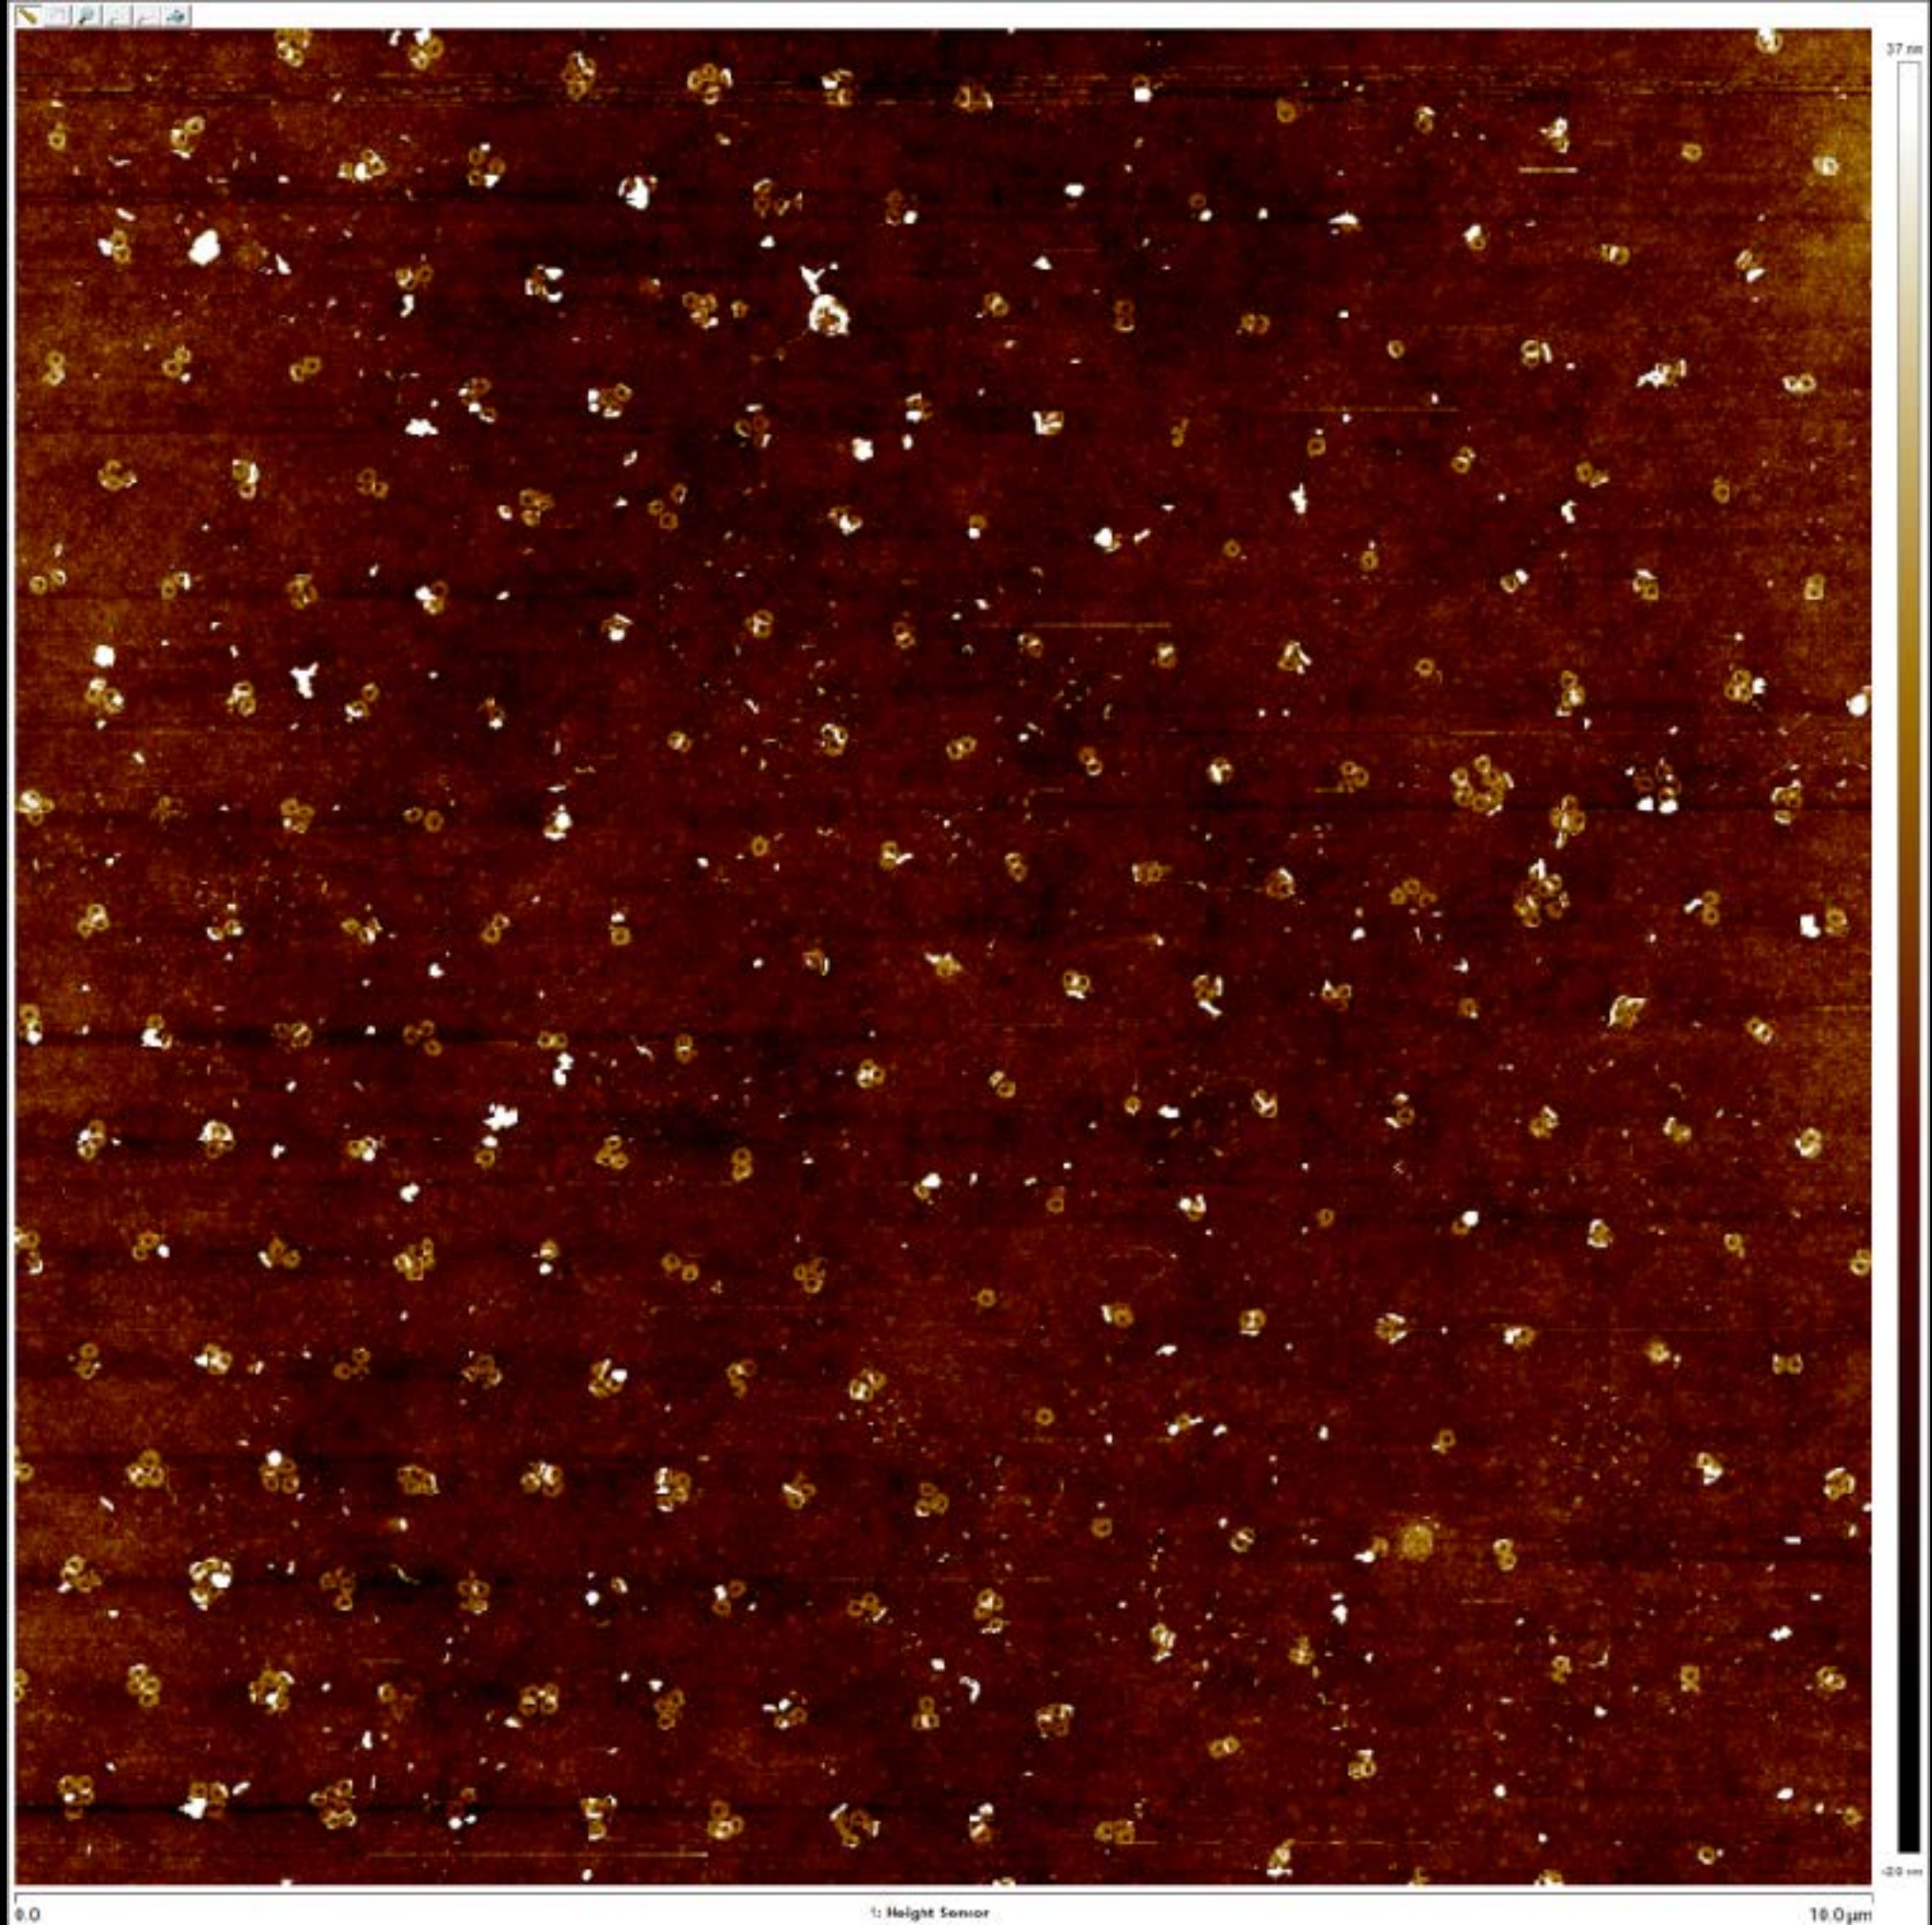



700 nm

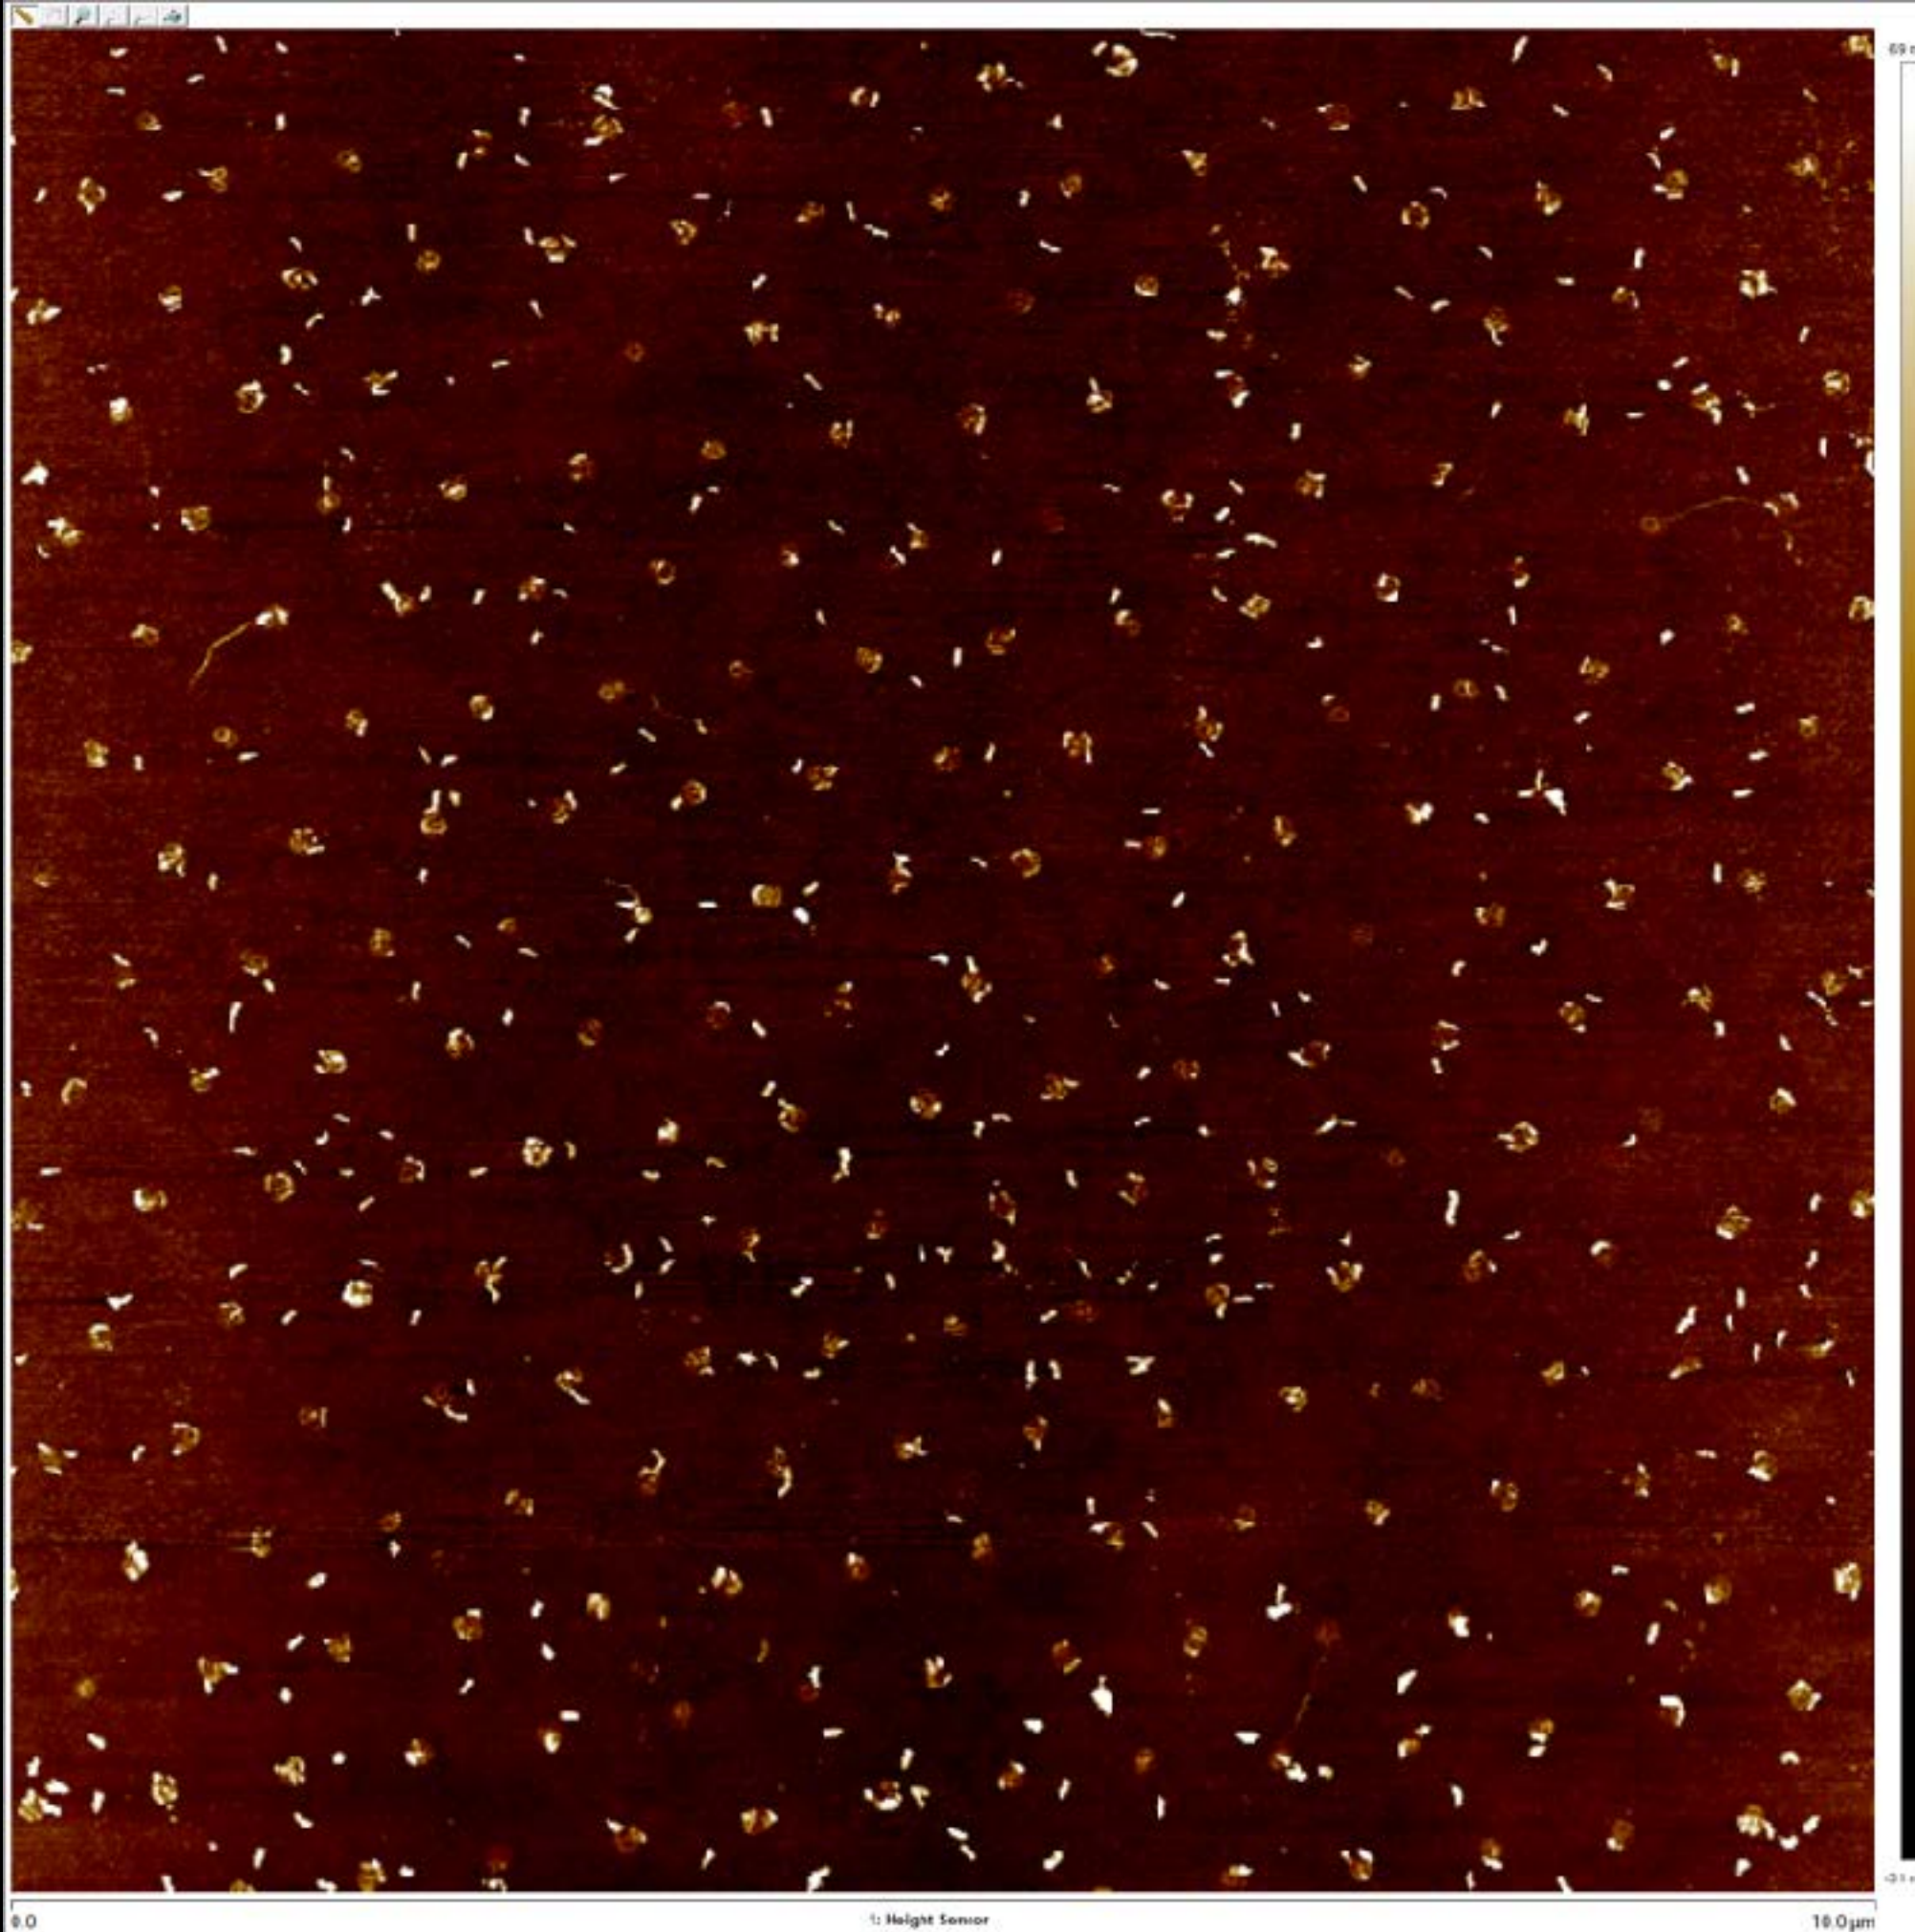



500 nm

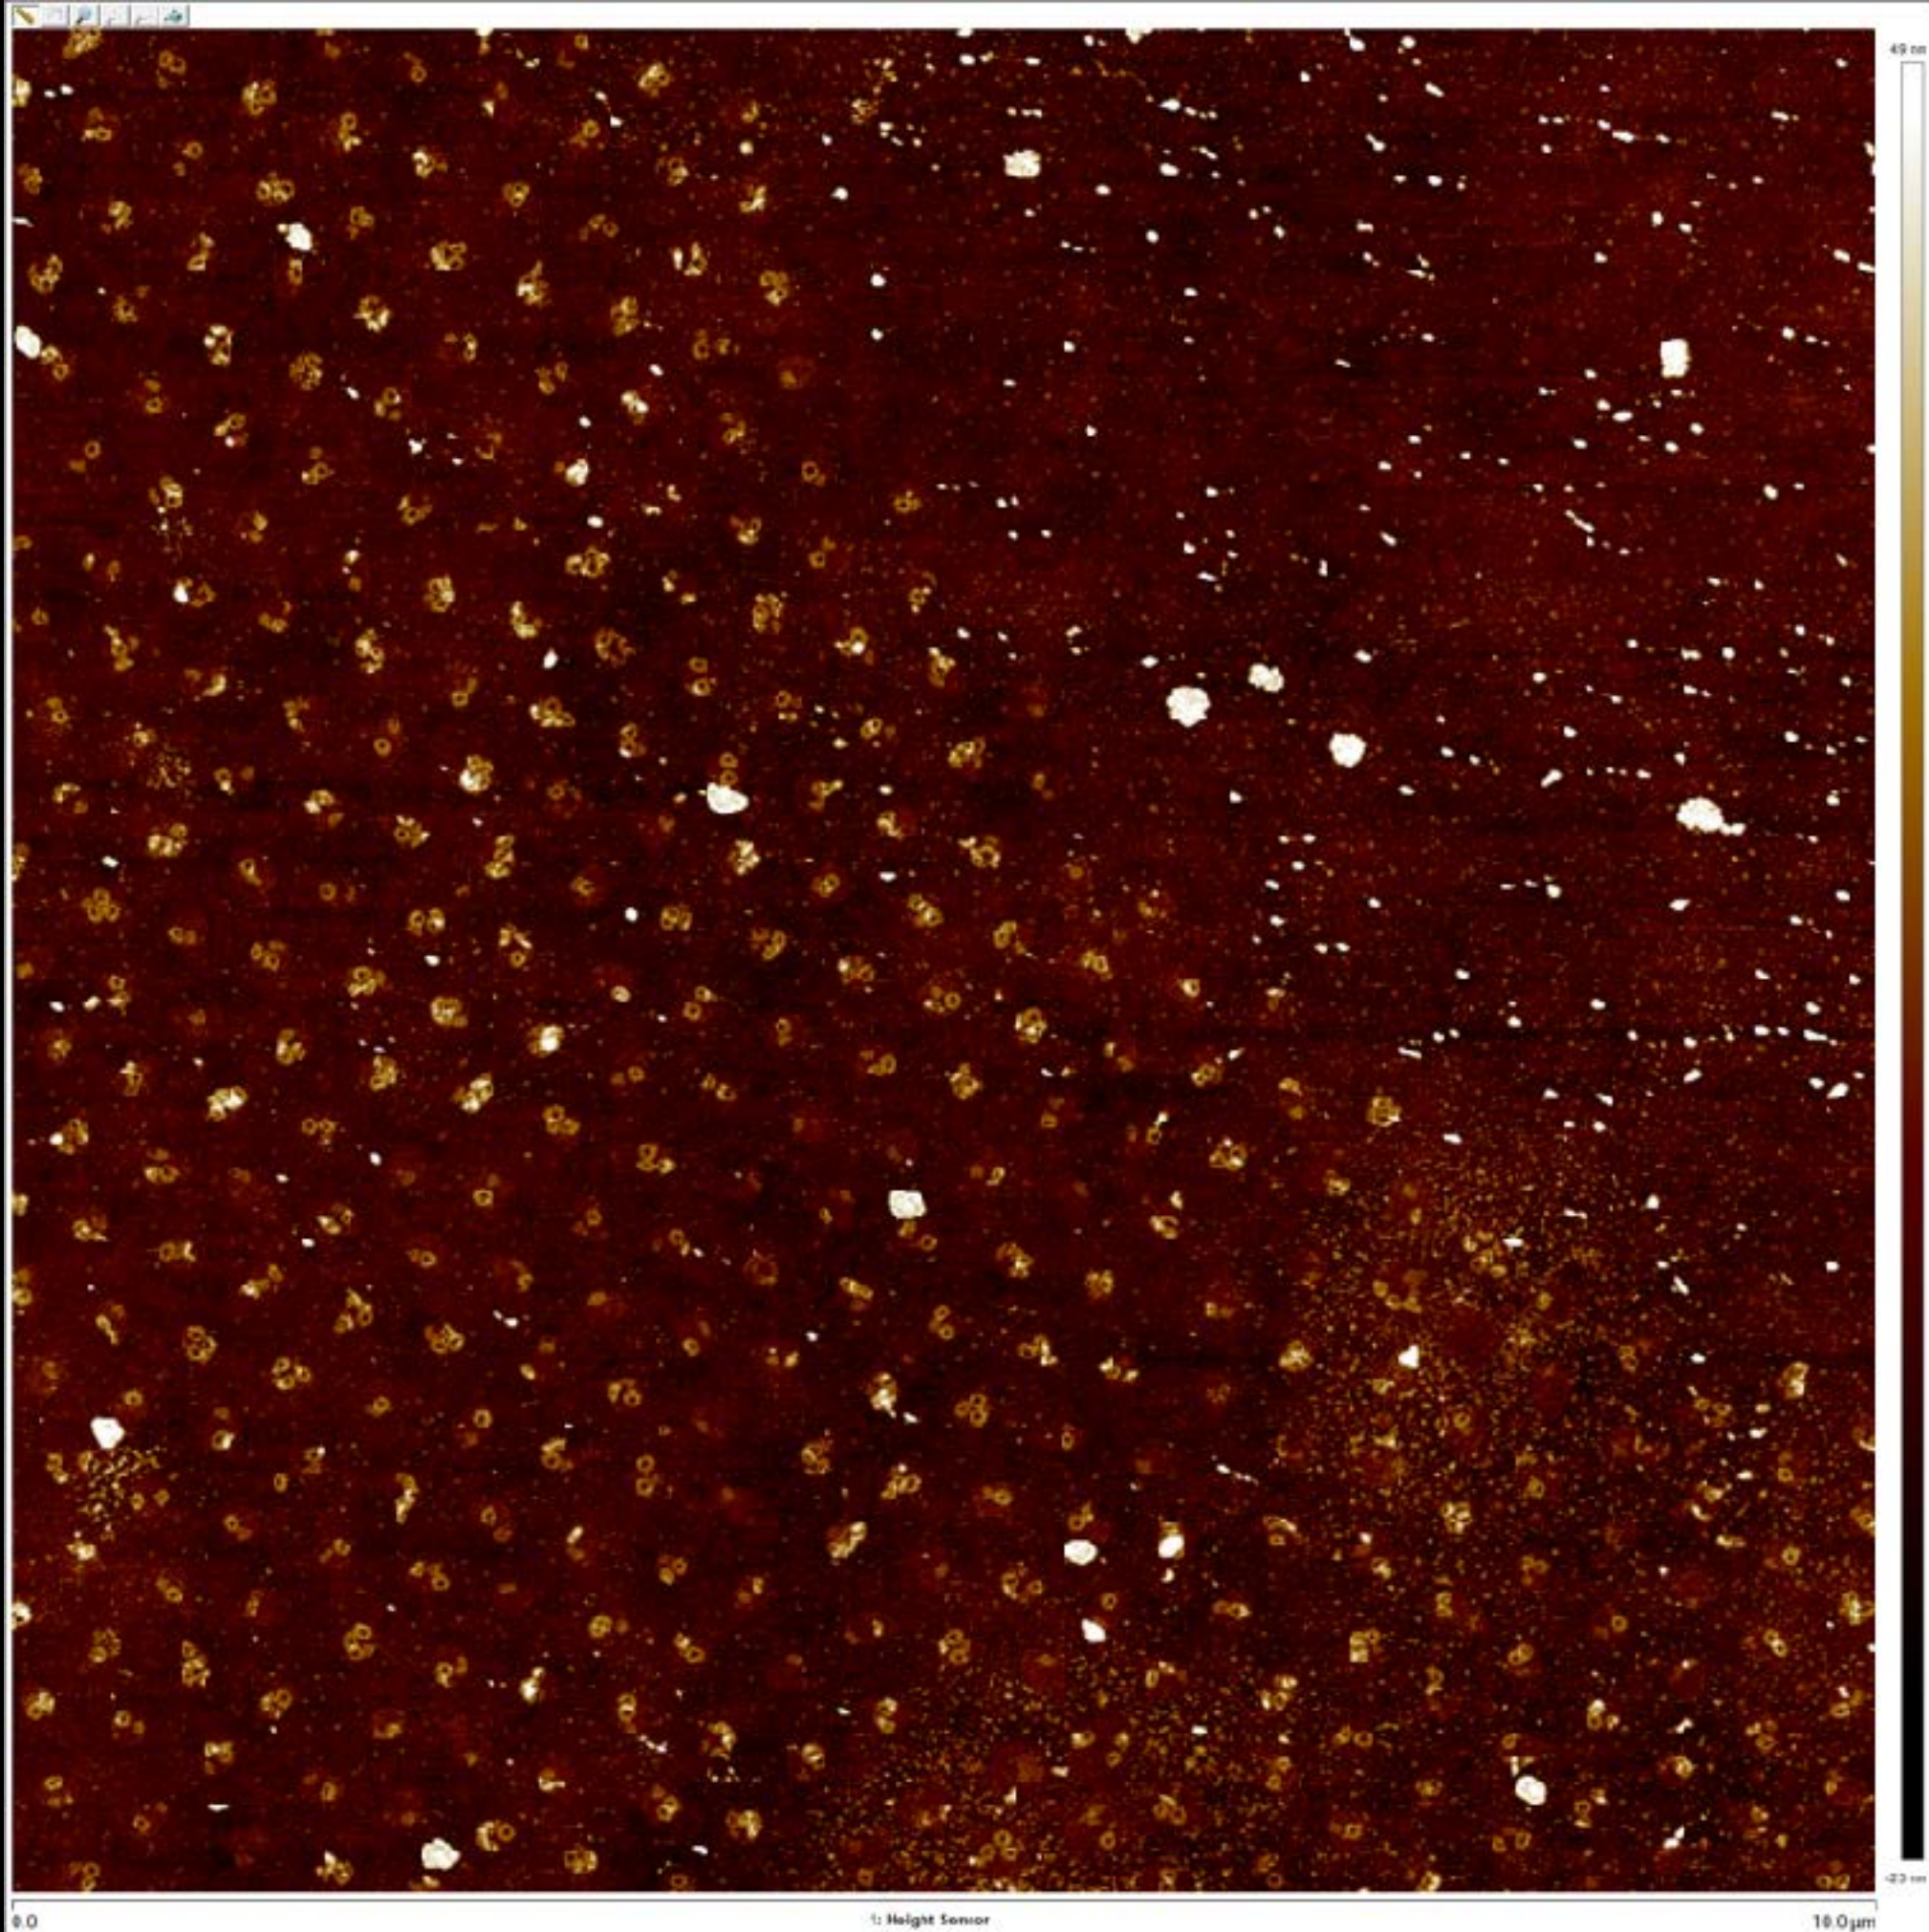



500 nm

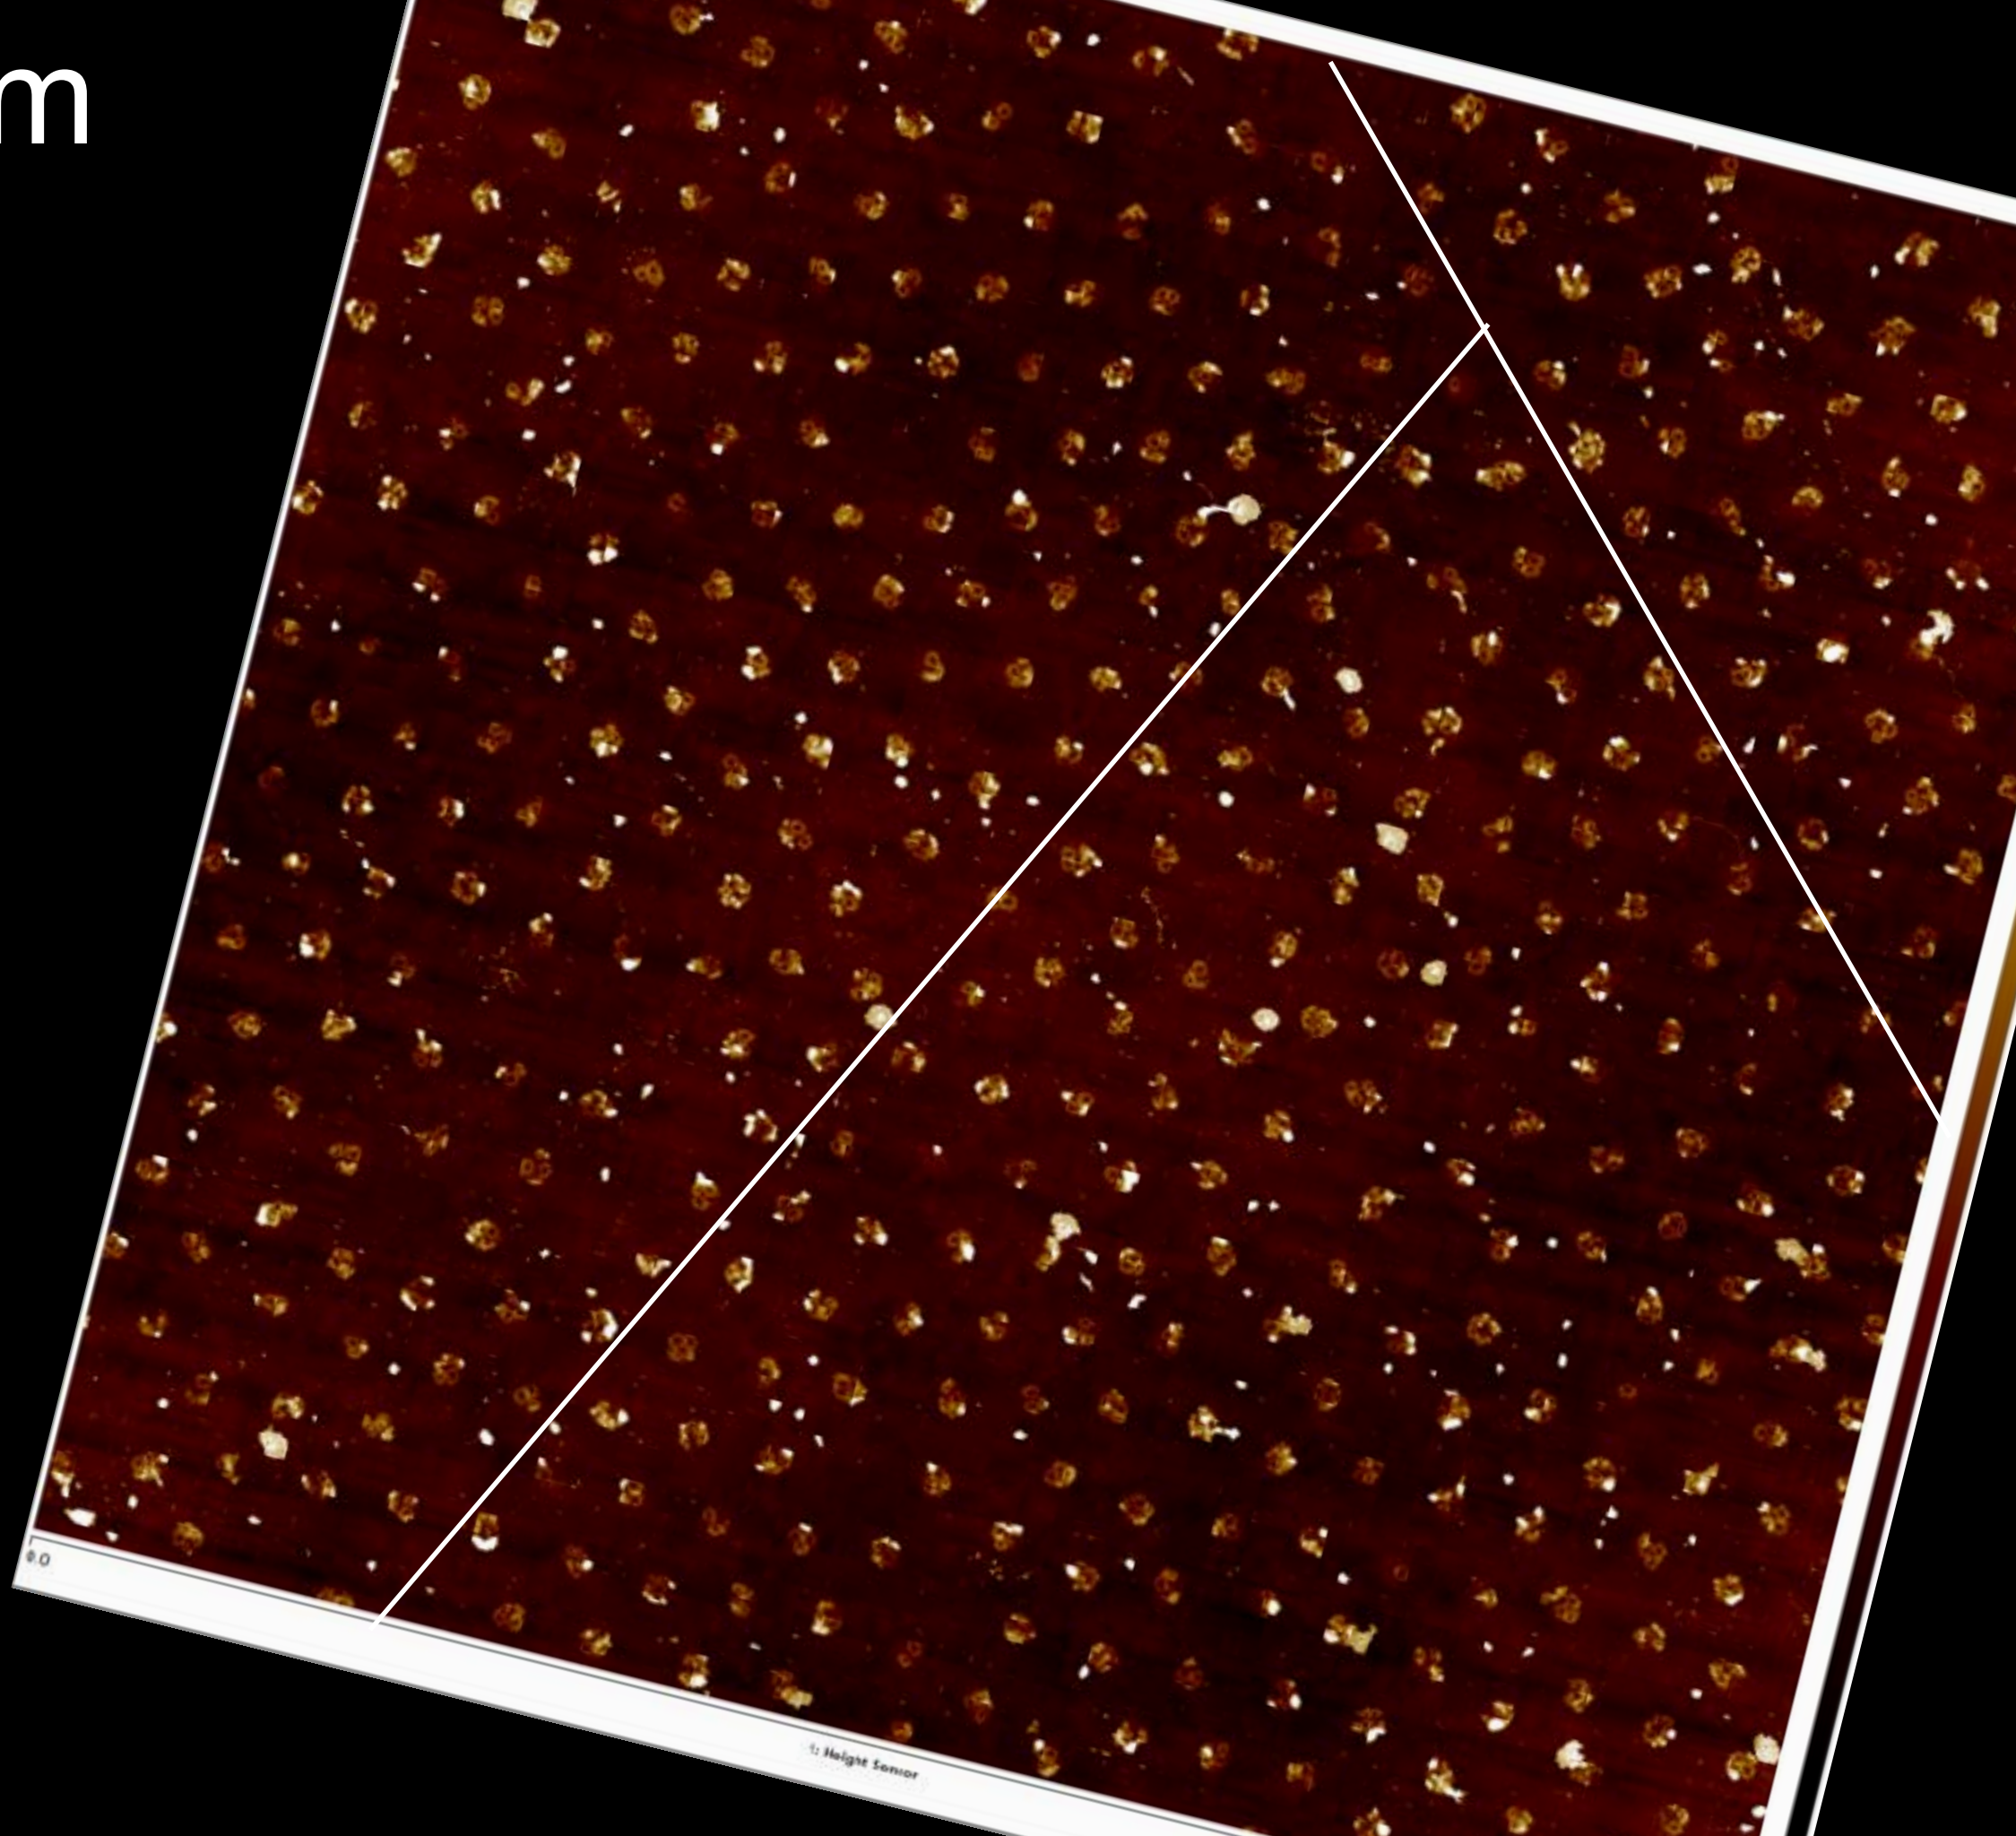



500 nm

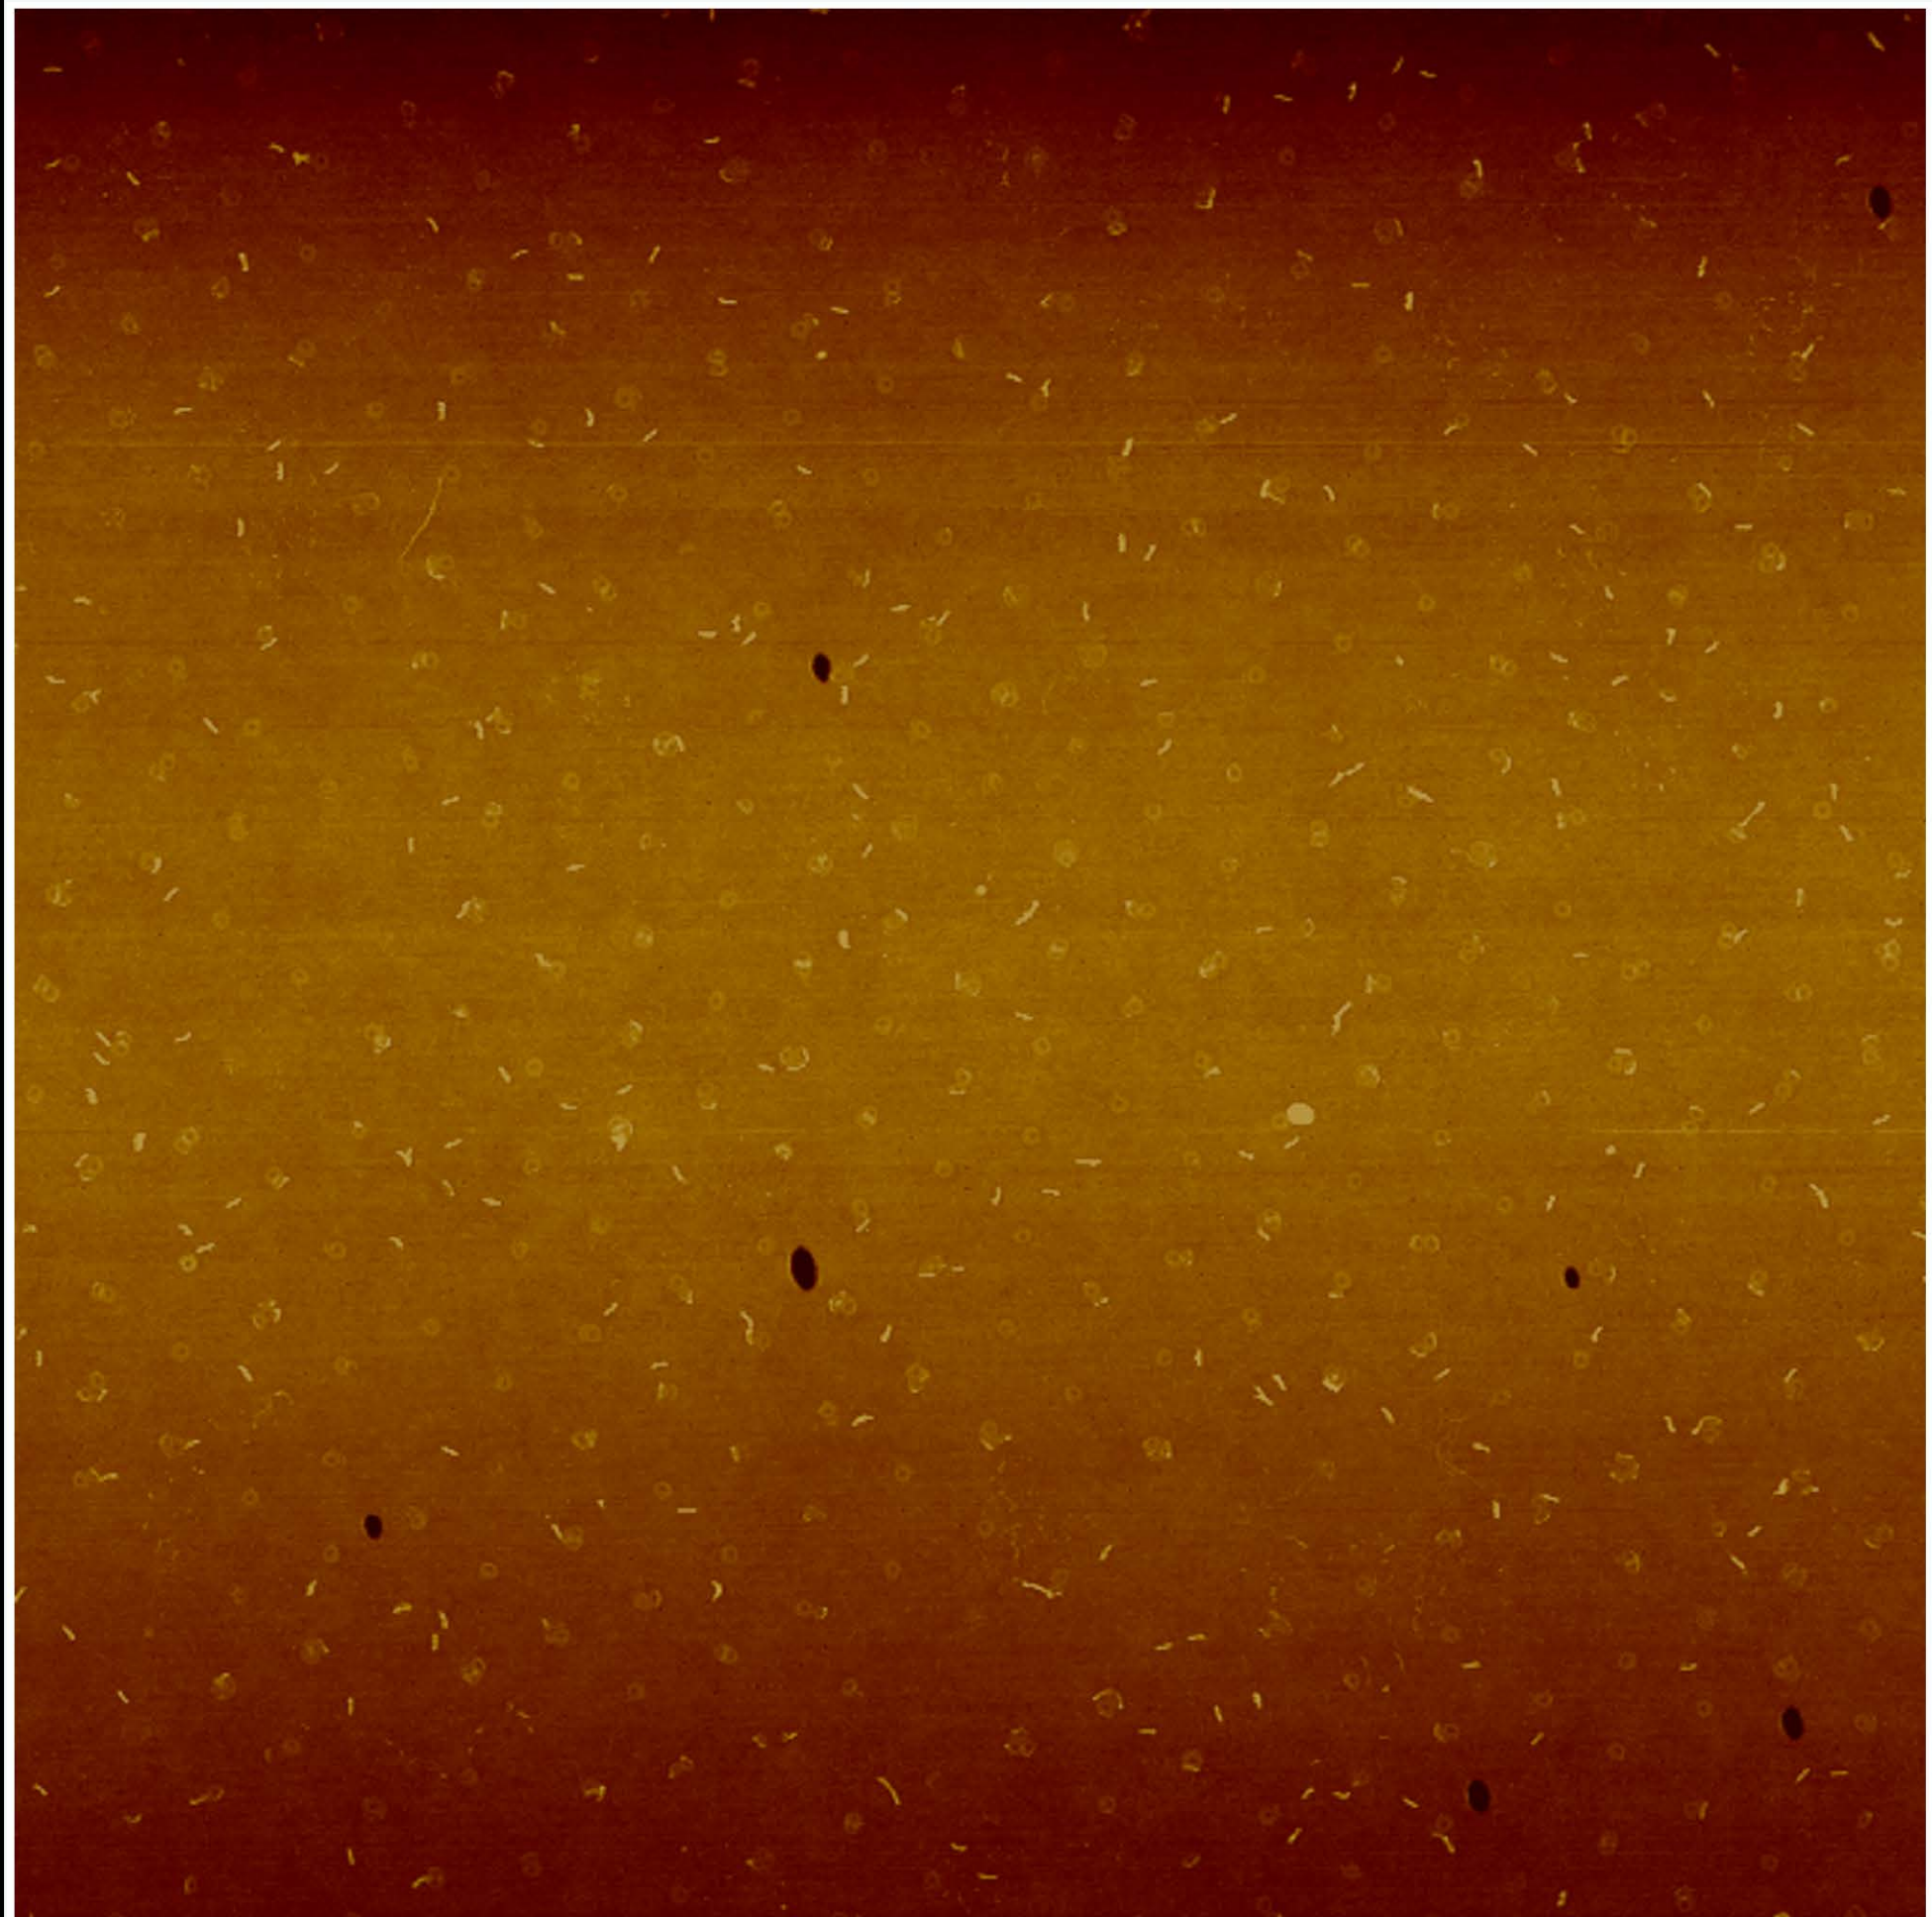

Height Sensor

2.0  $\mu\text{m}$



500 nm

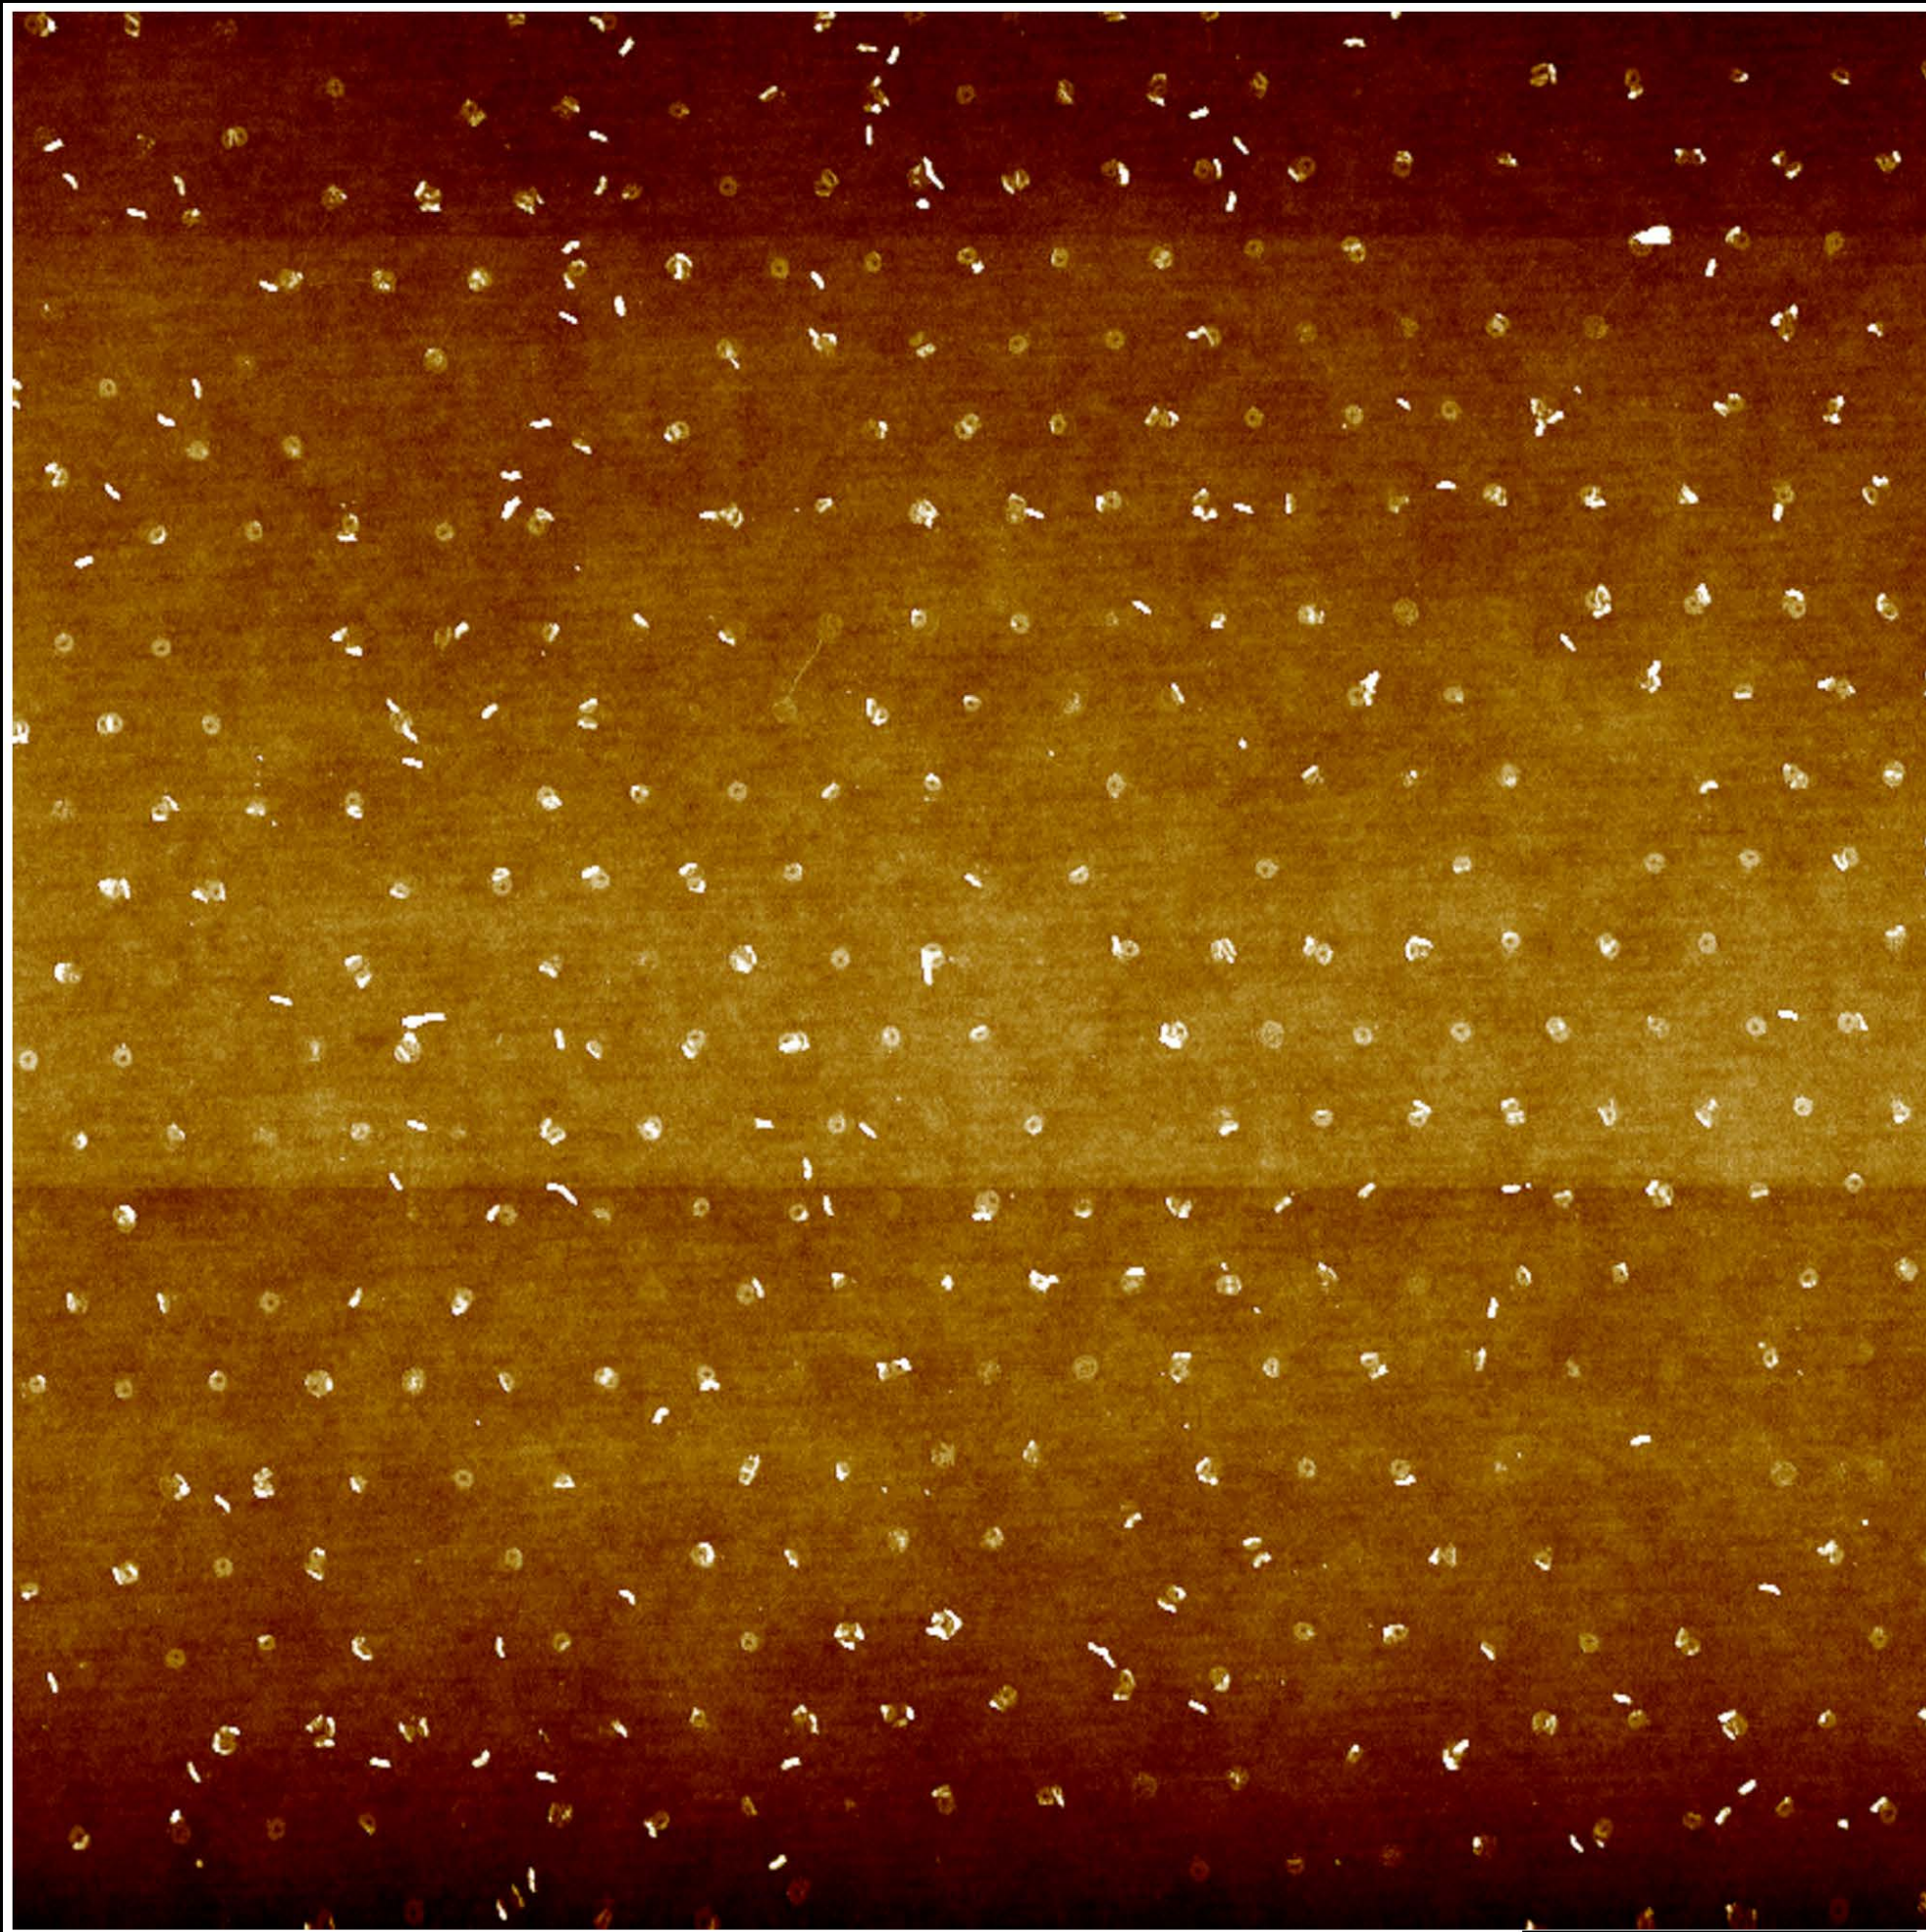

U. S. 10

00



400 nm

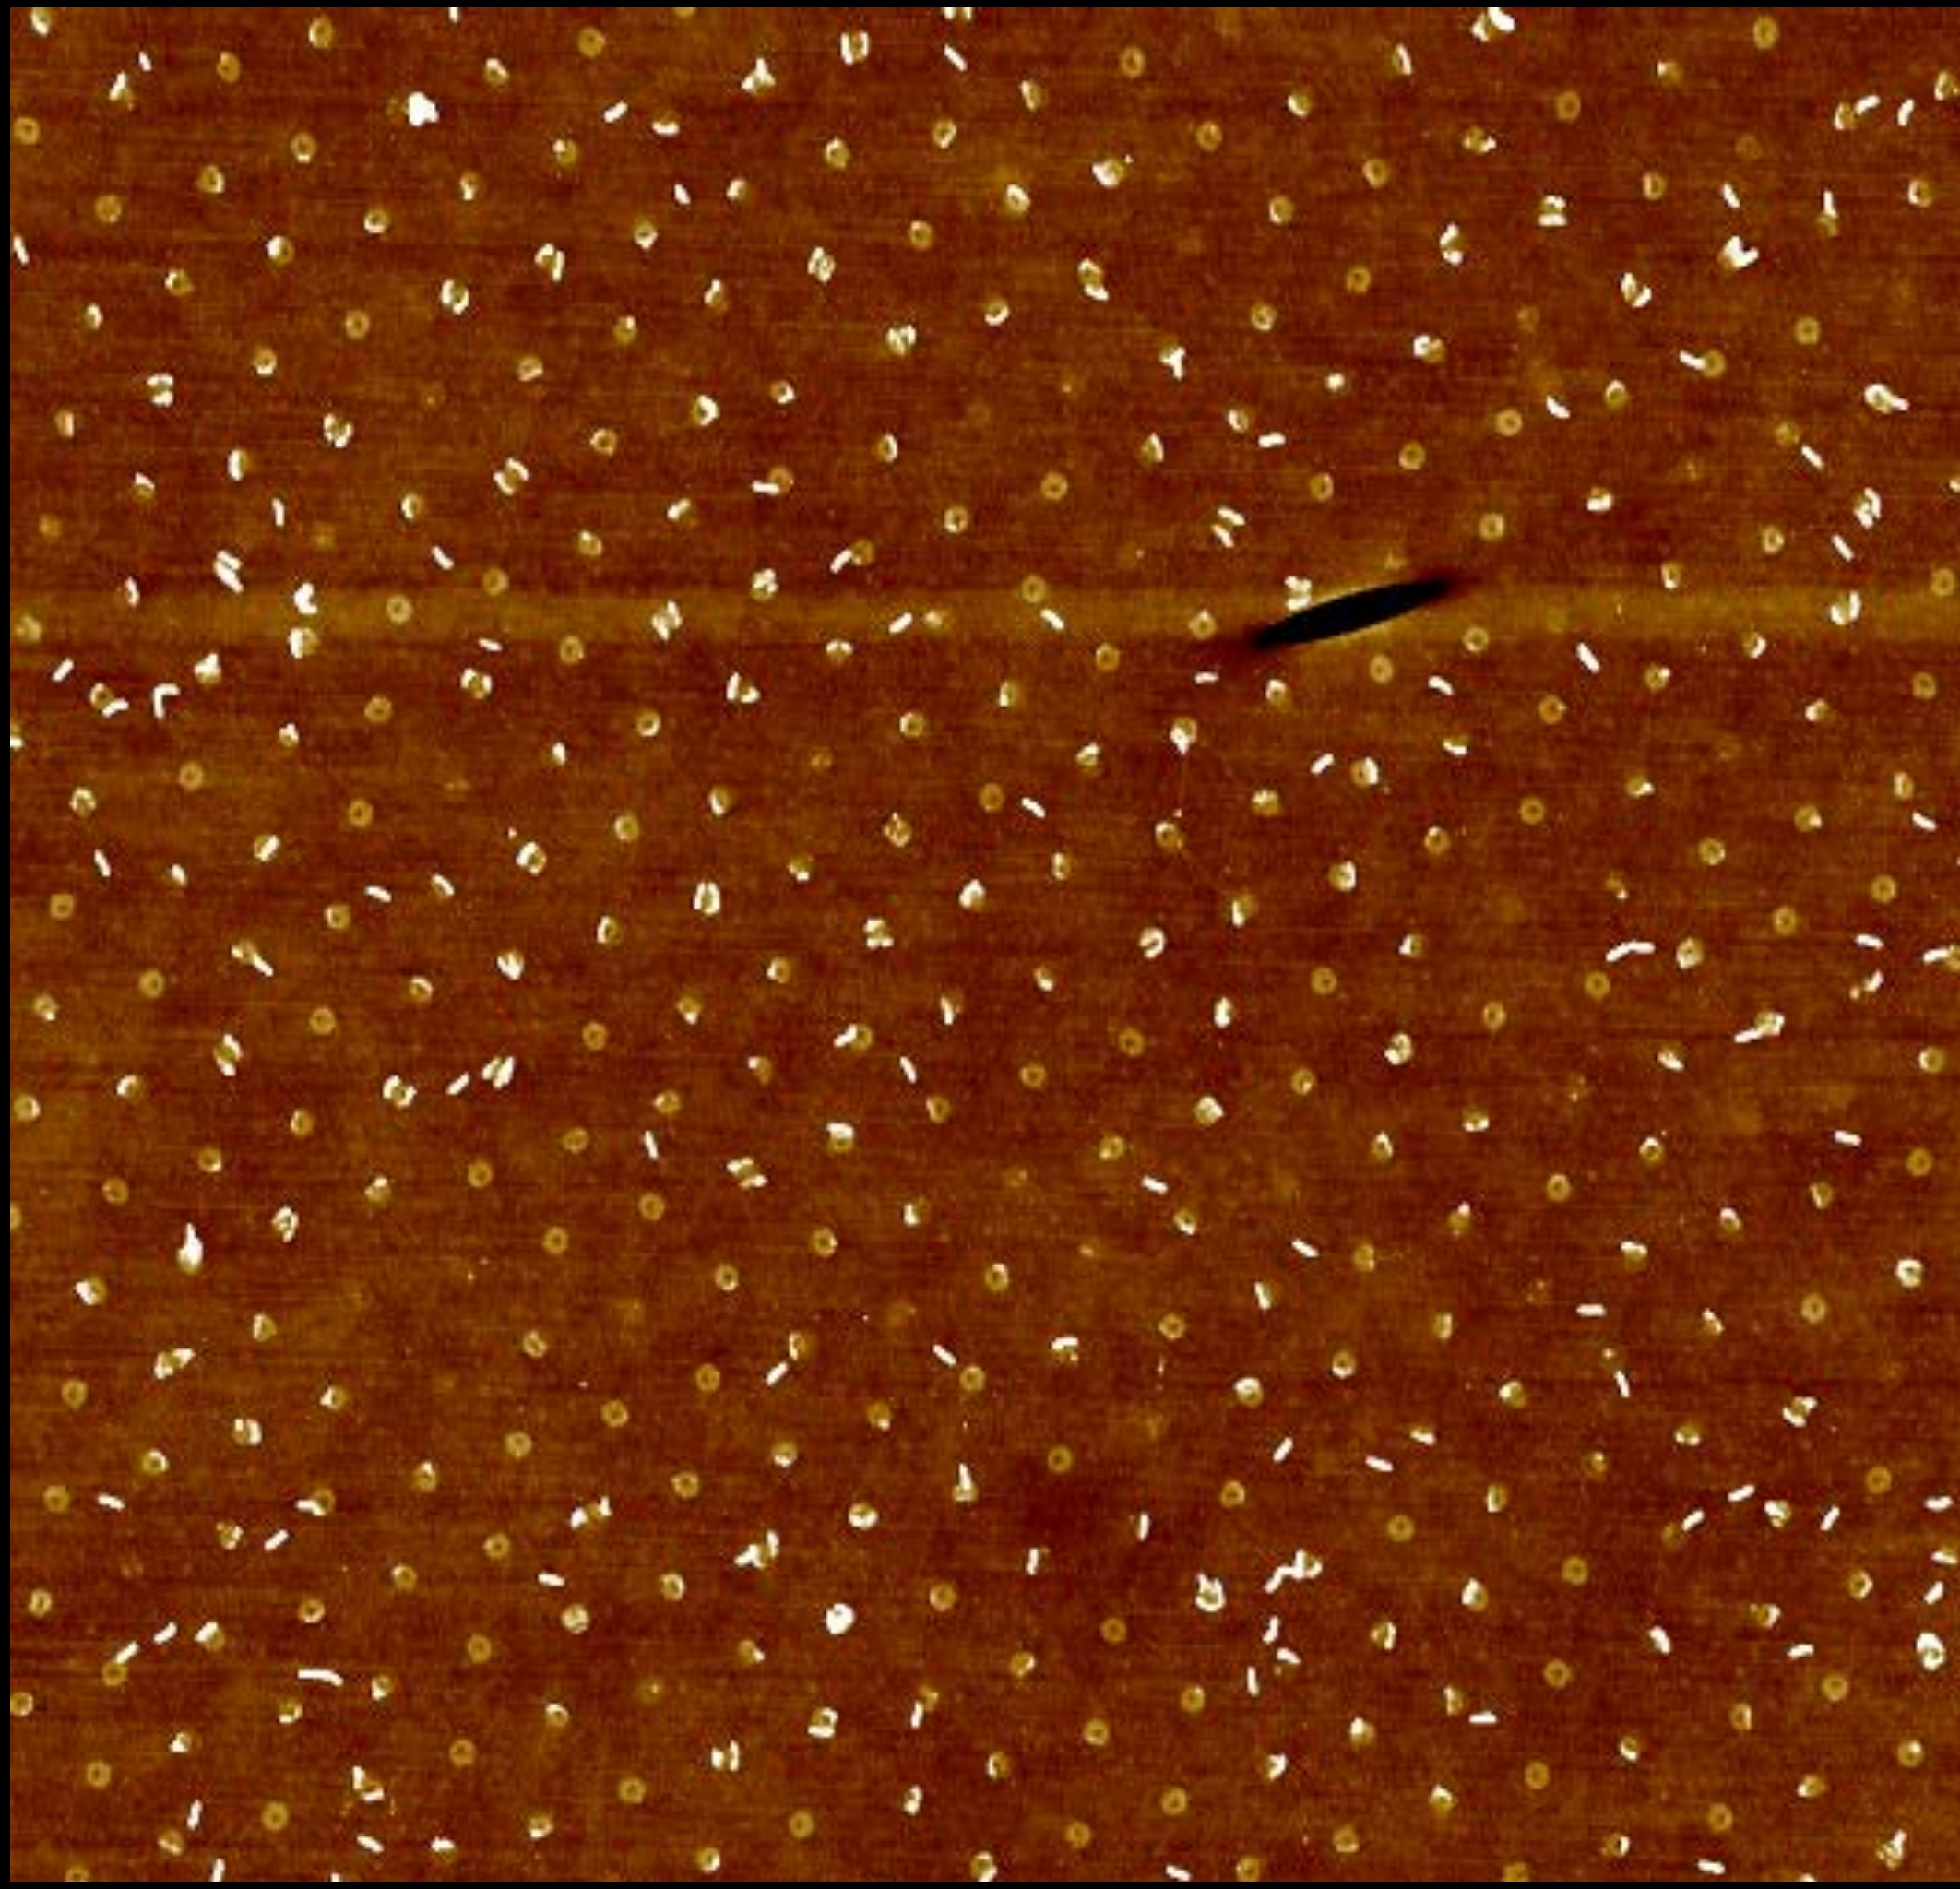



400 nm

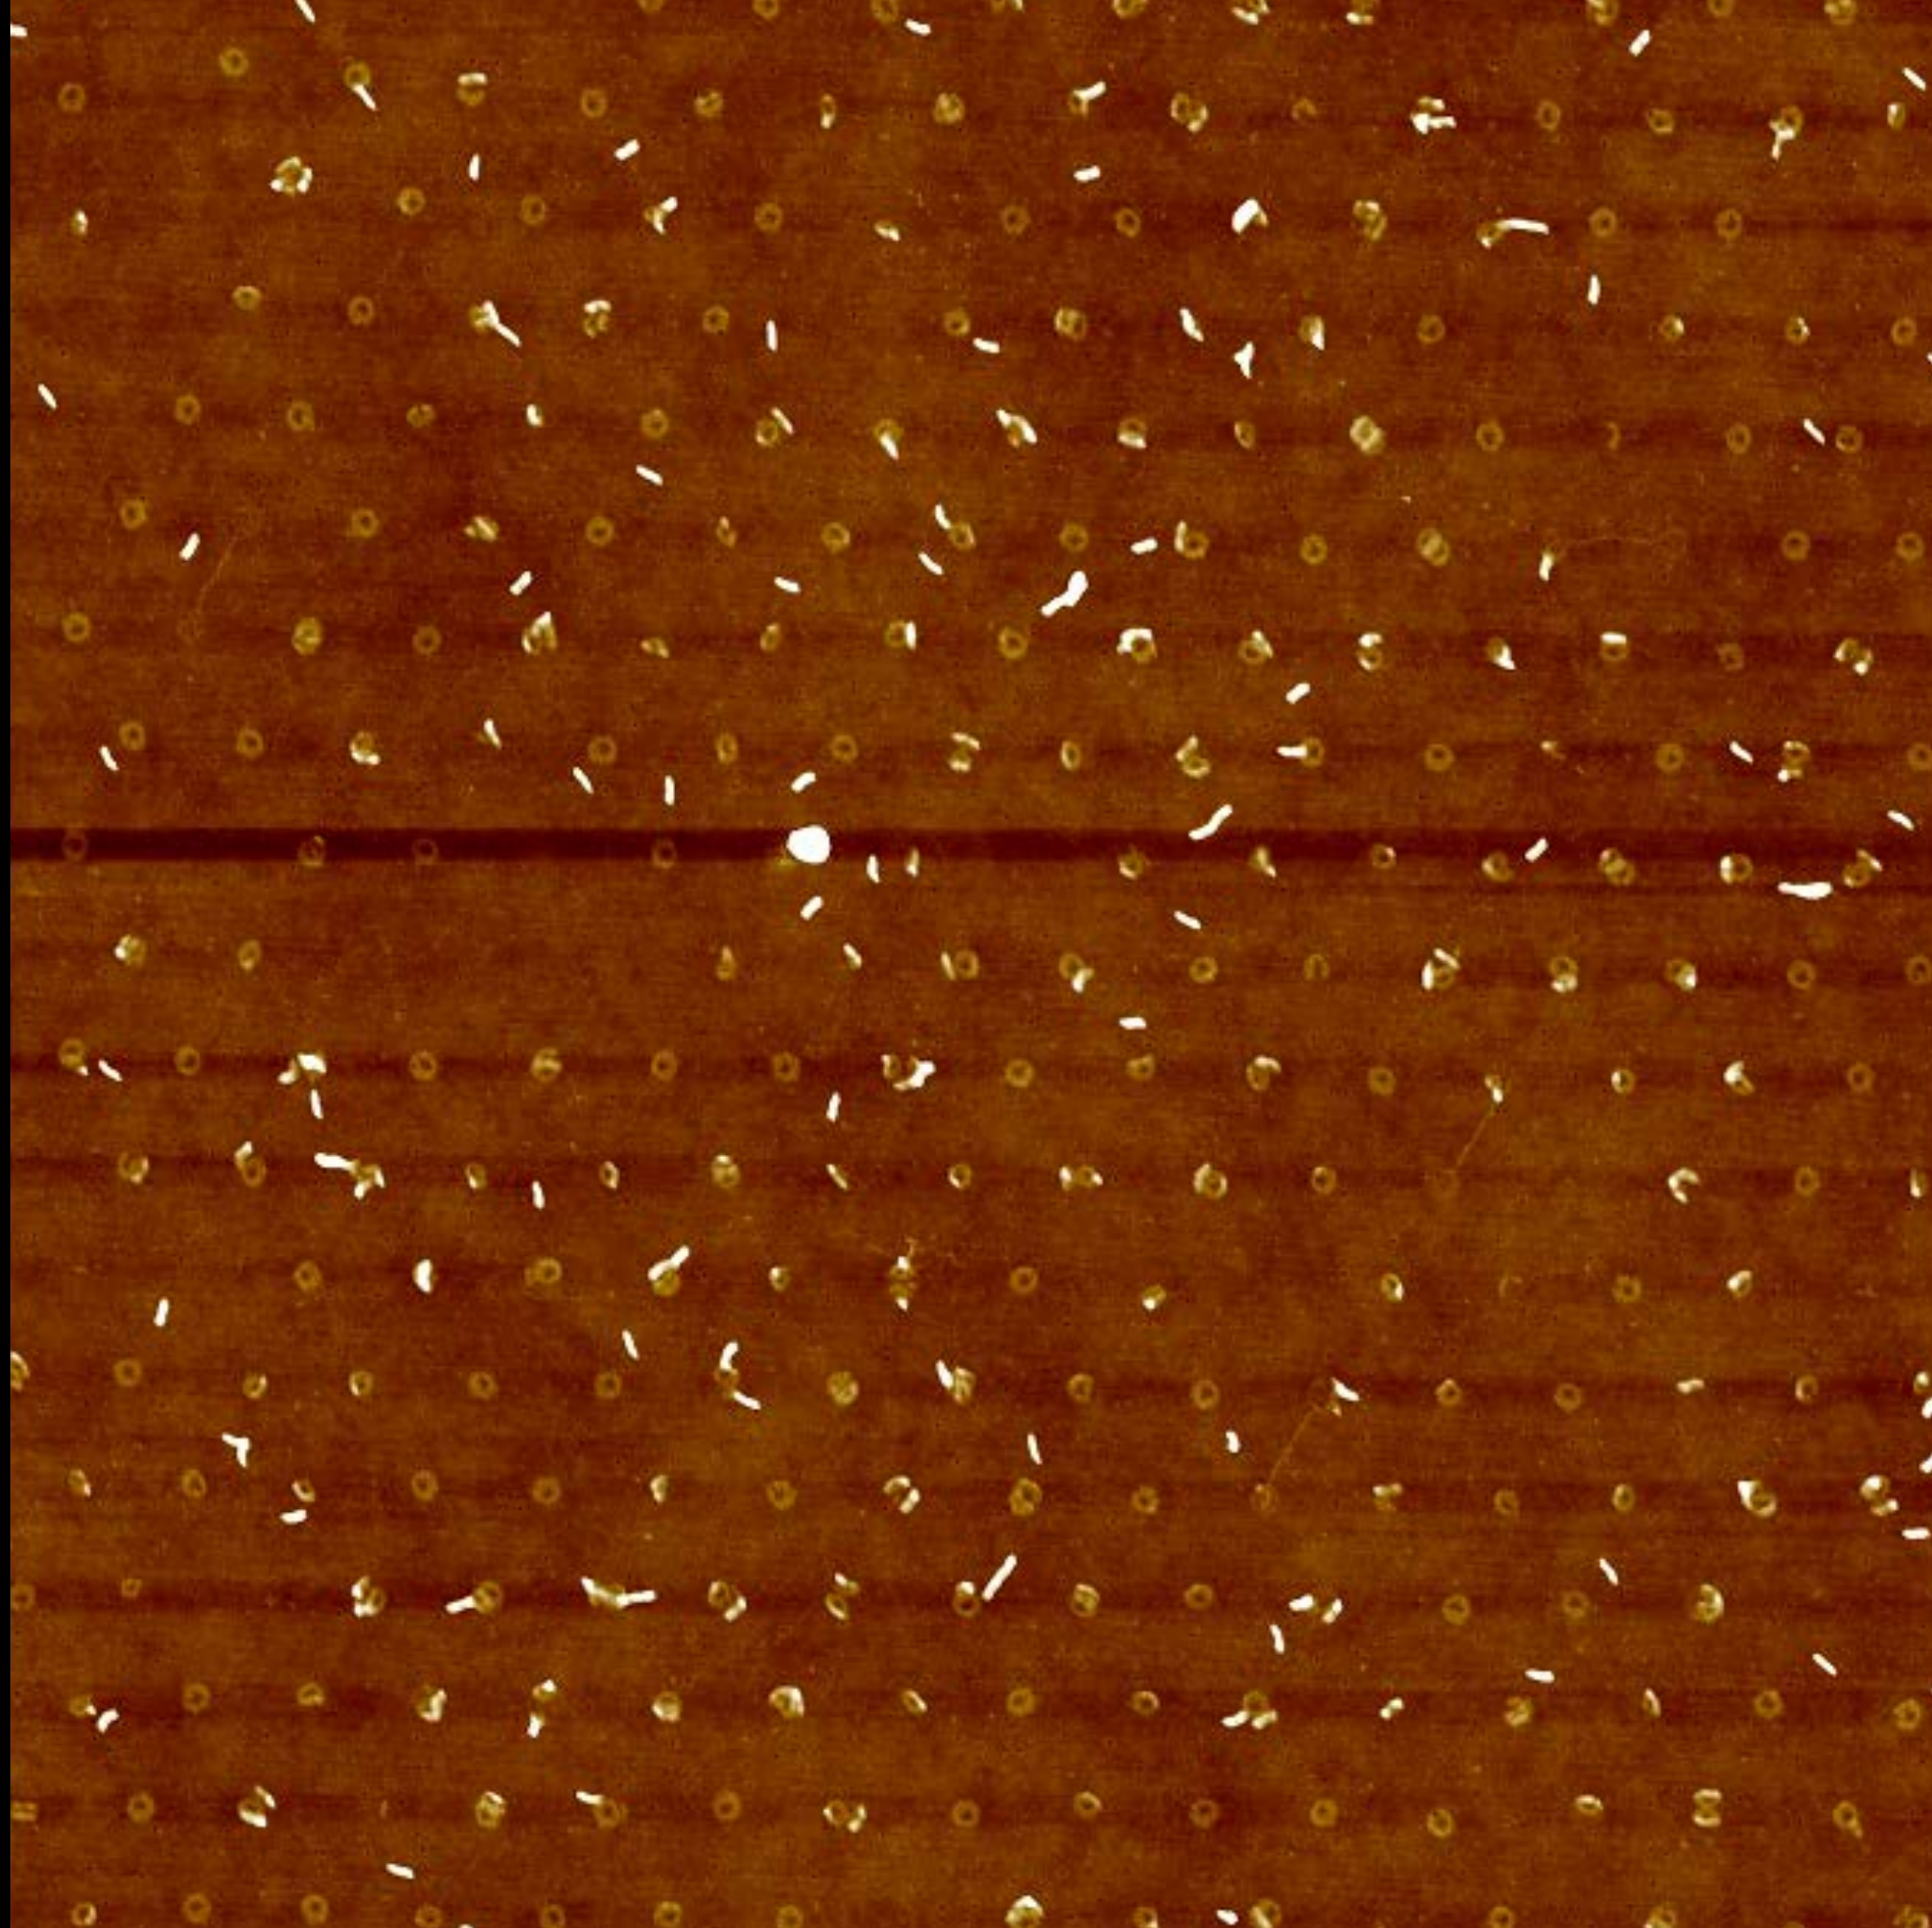



400 nm

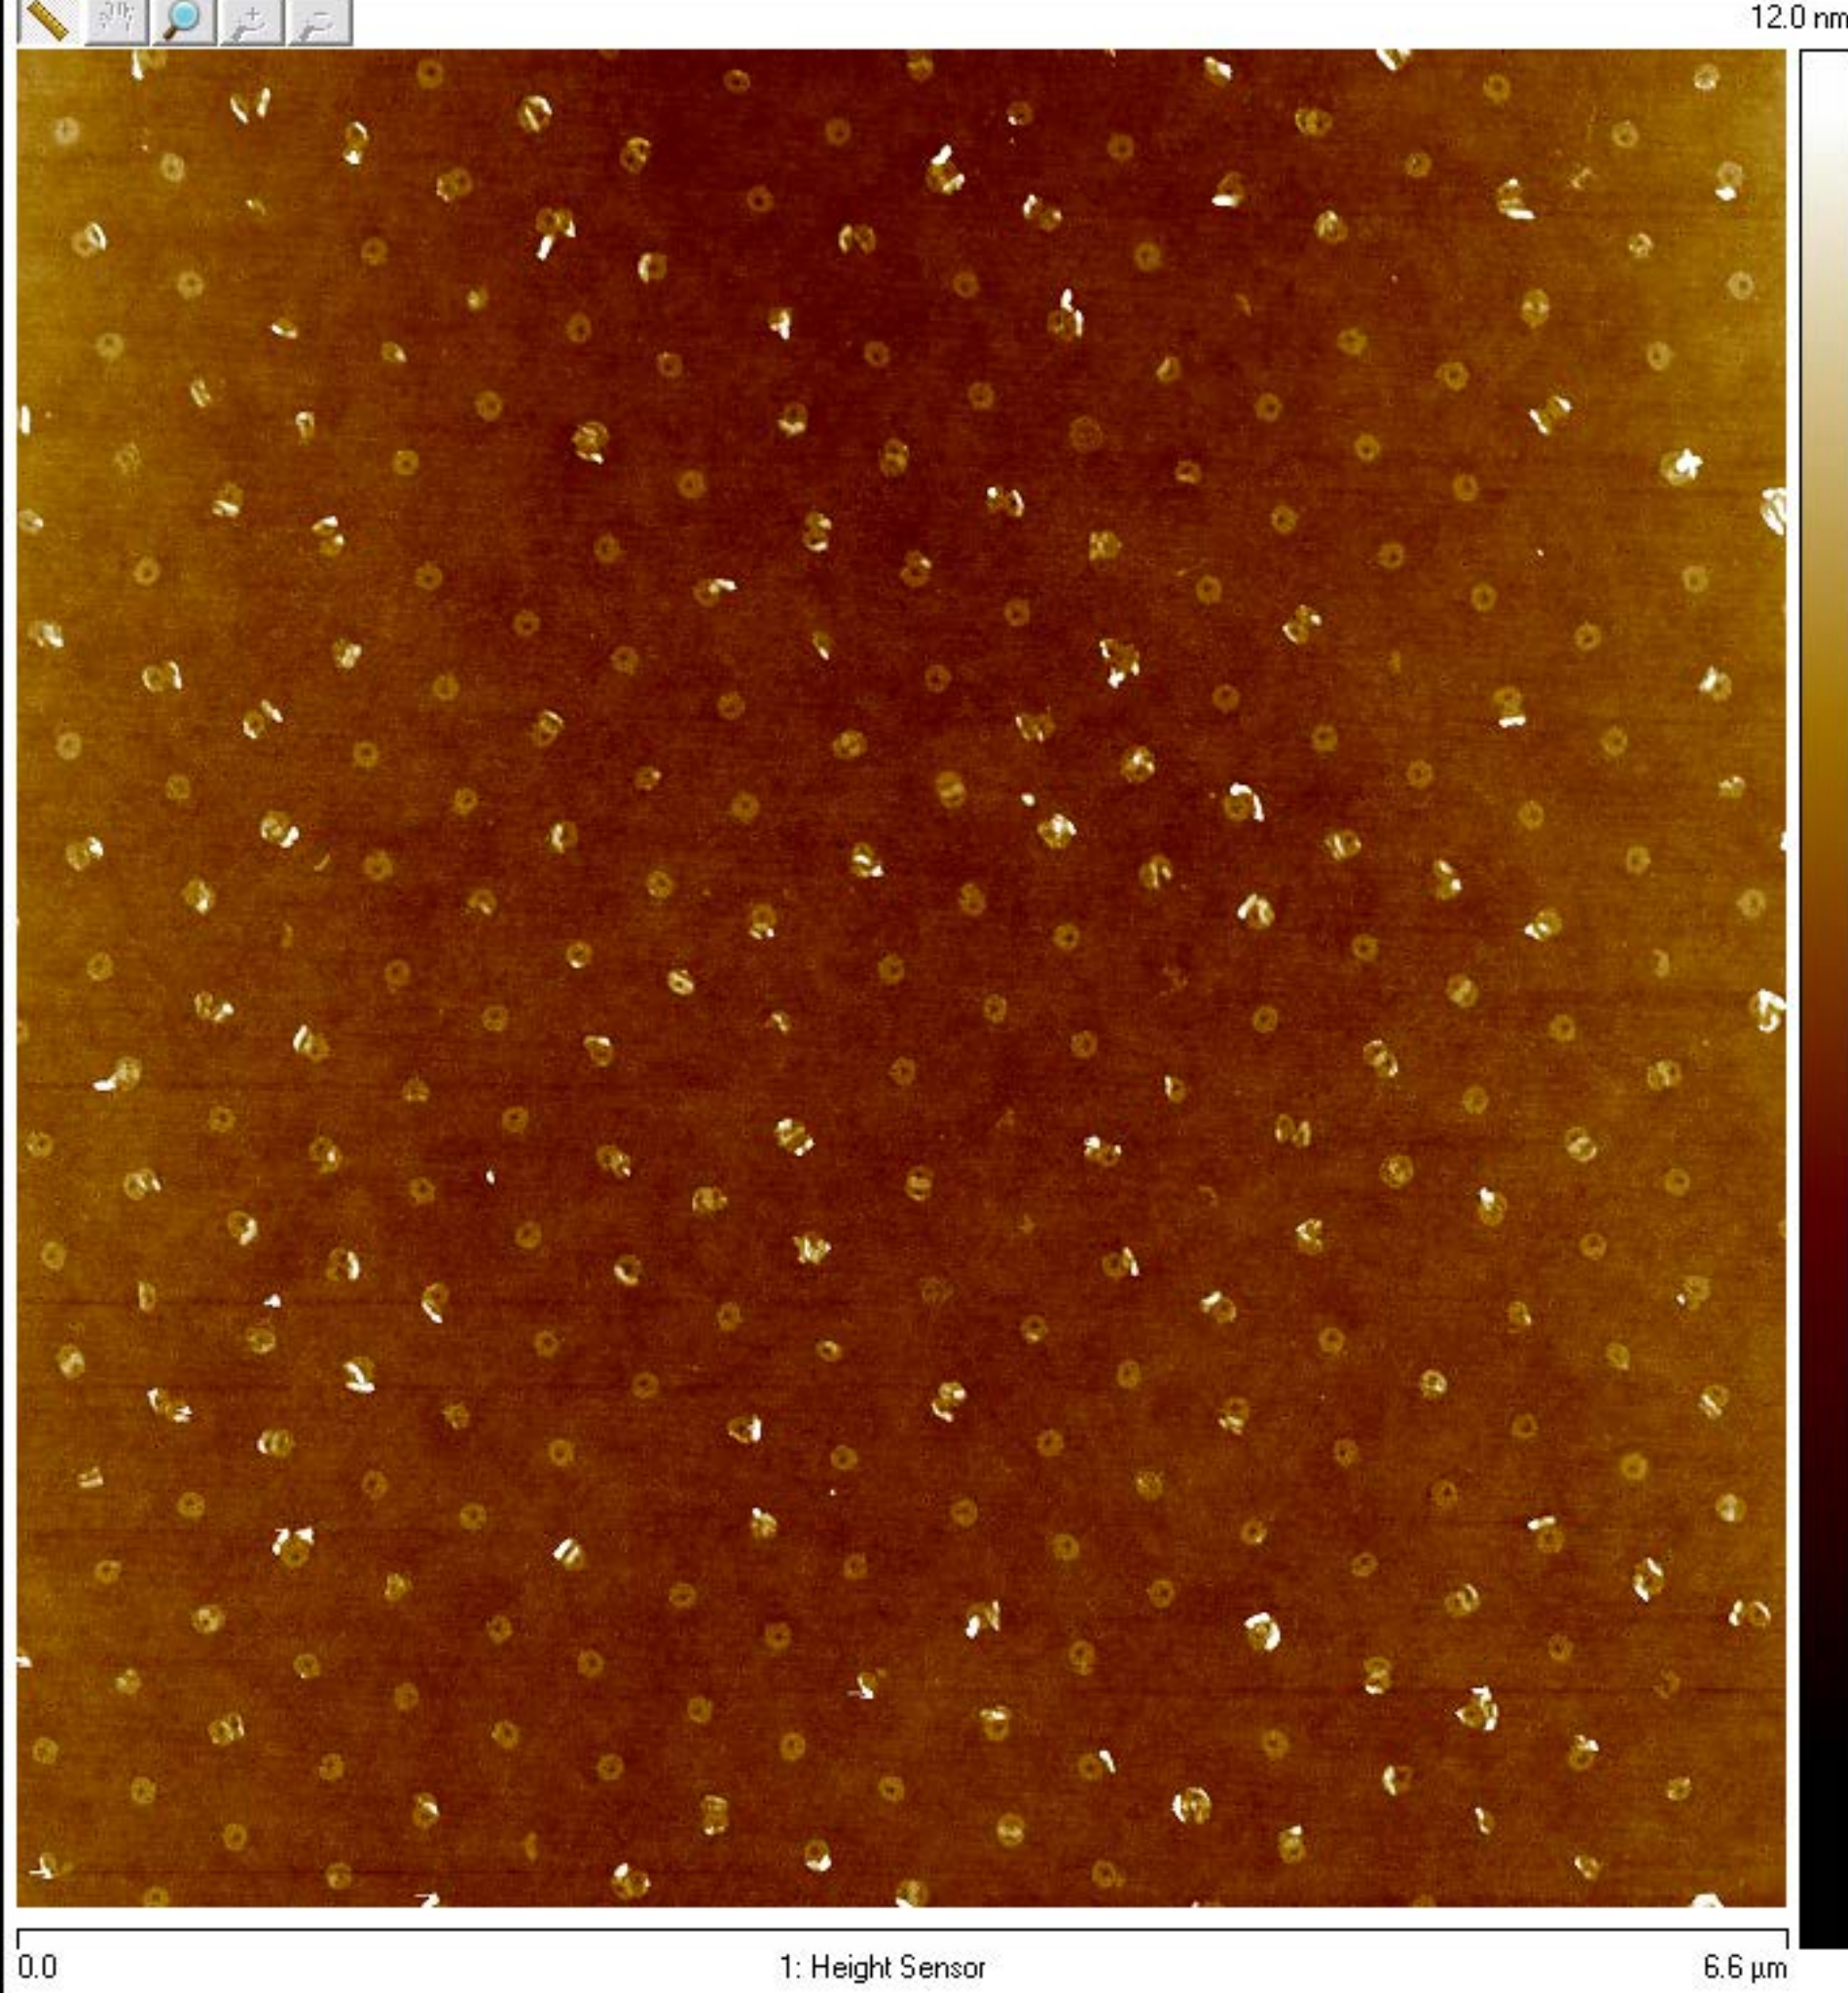



350 nm

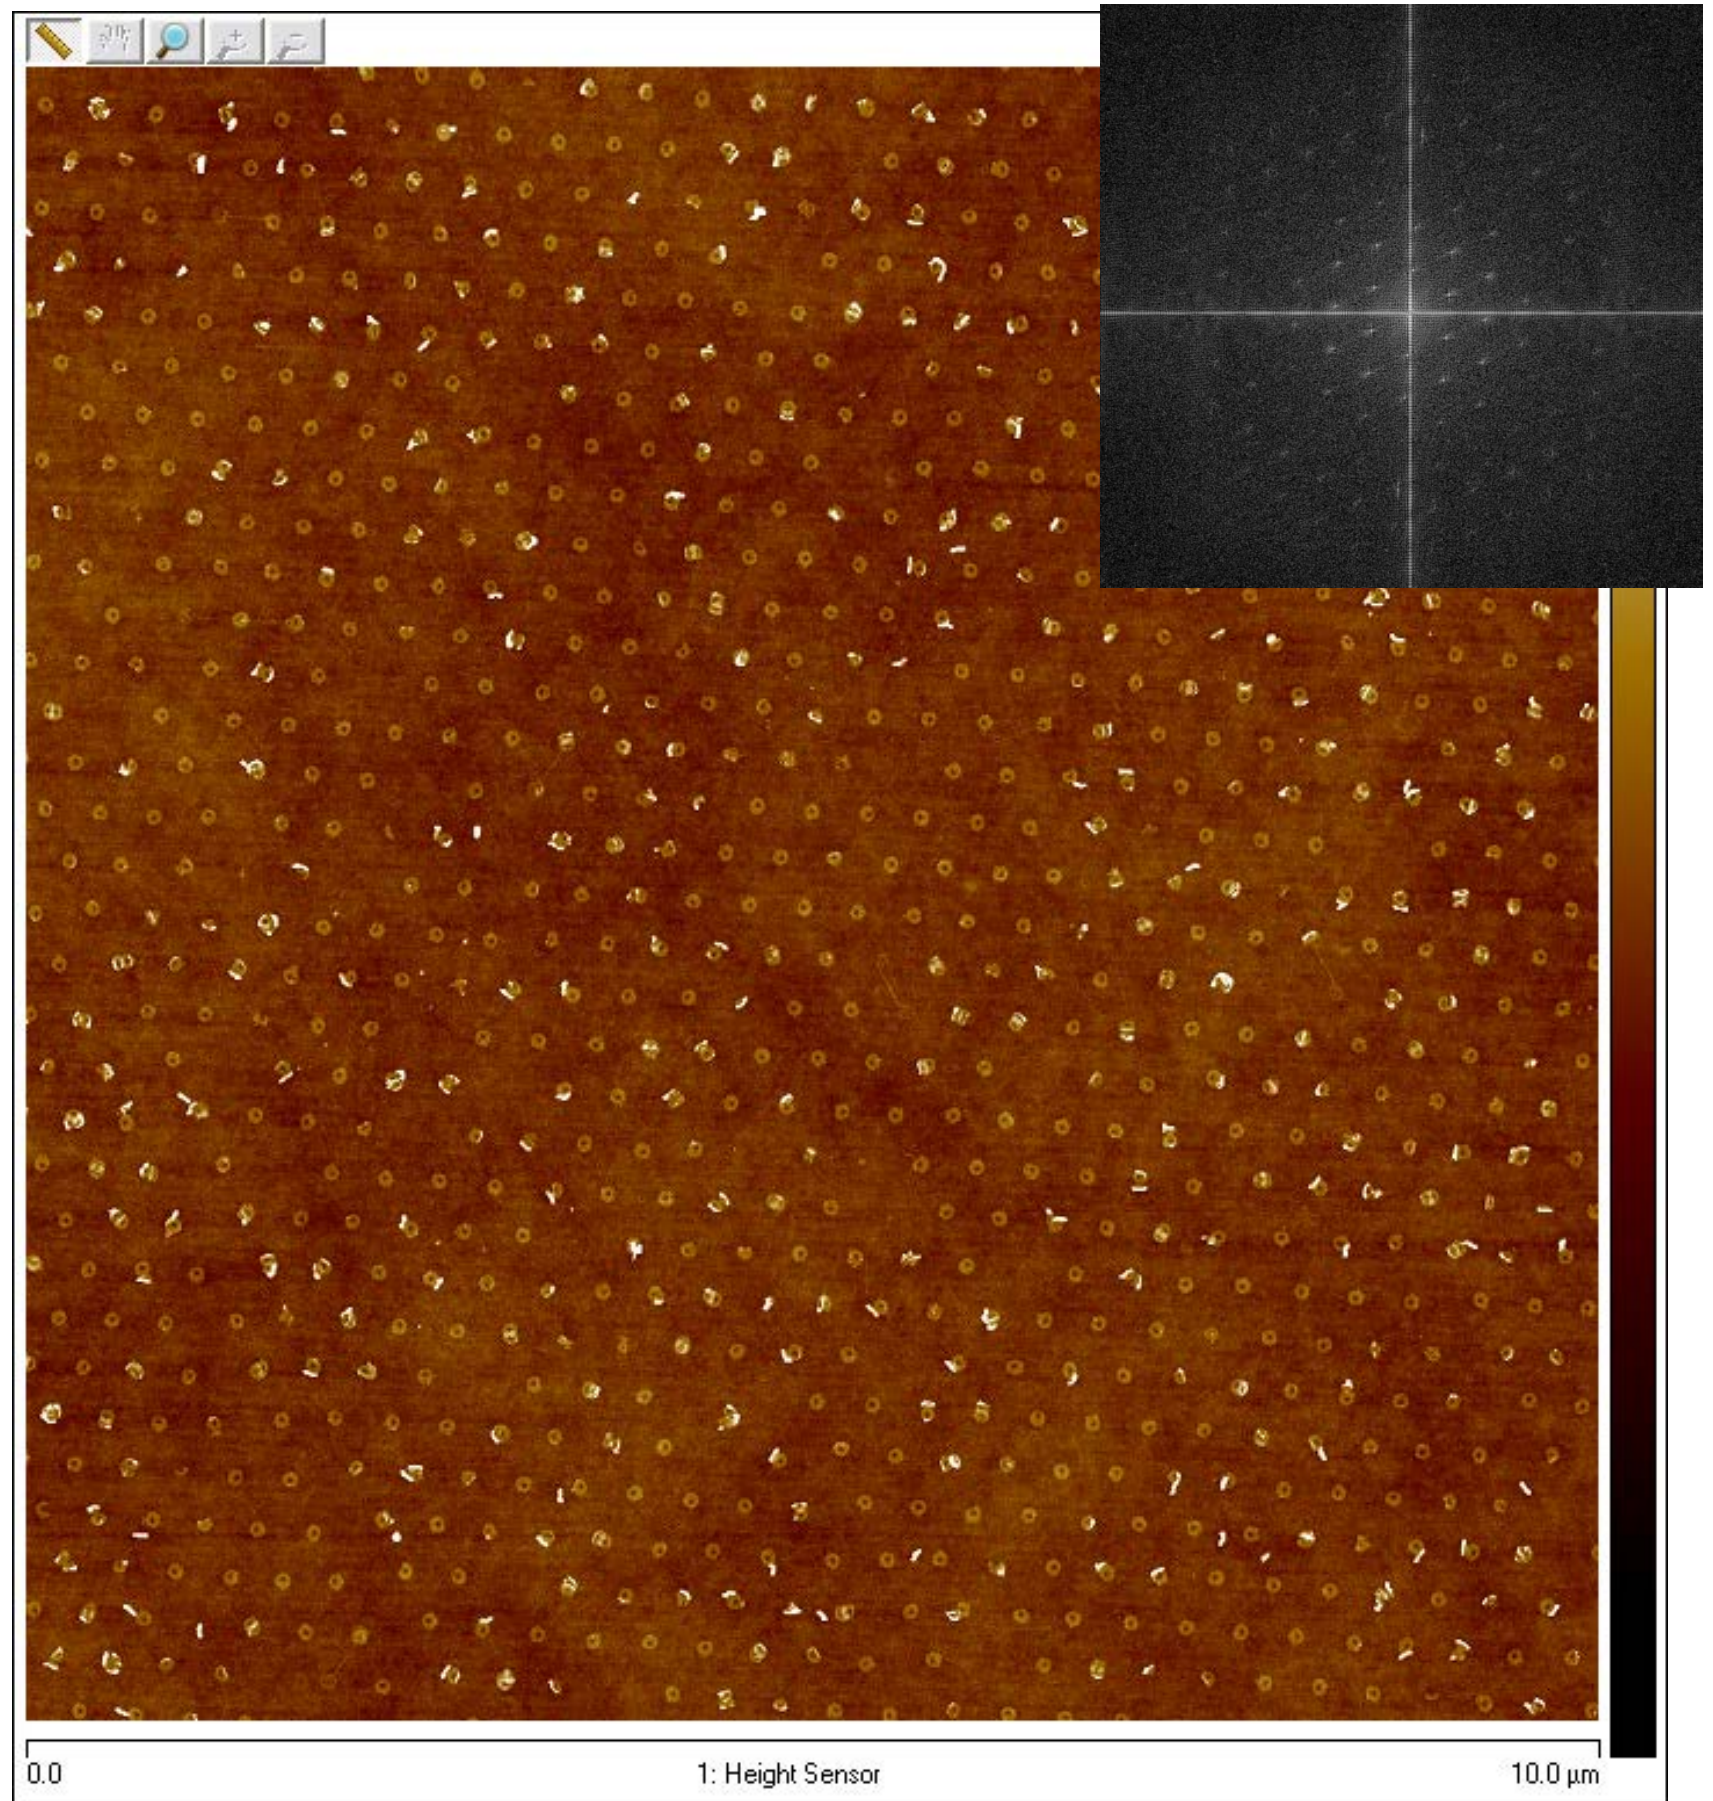

200 pM: 0- 8.2%, **1- 73%**, 2- 18.8% (438 sites)



350 nm

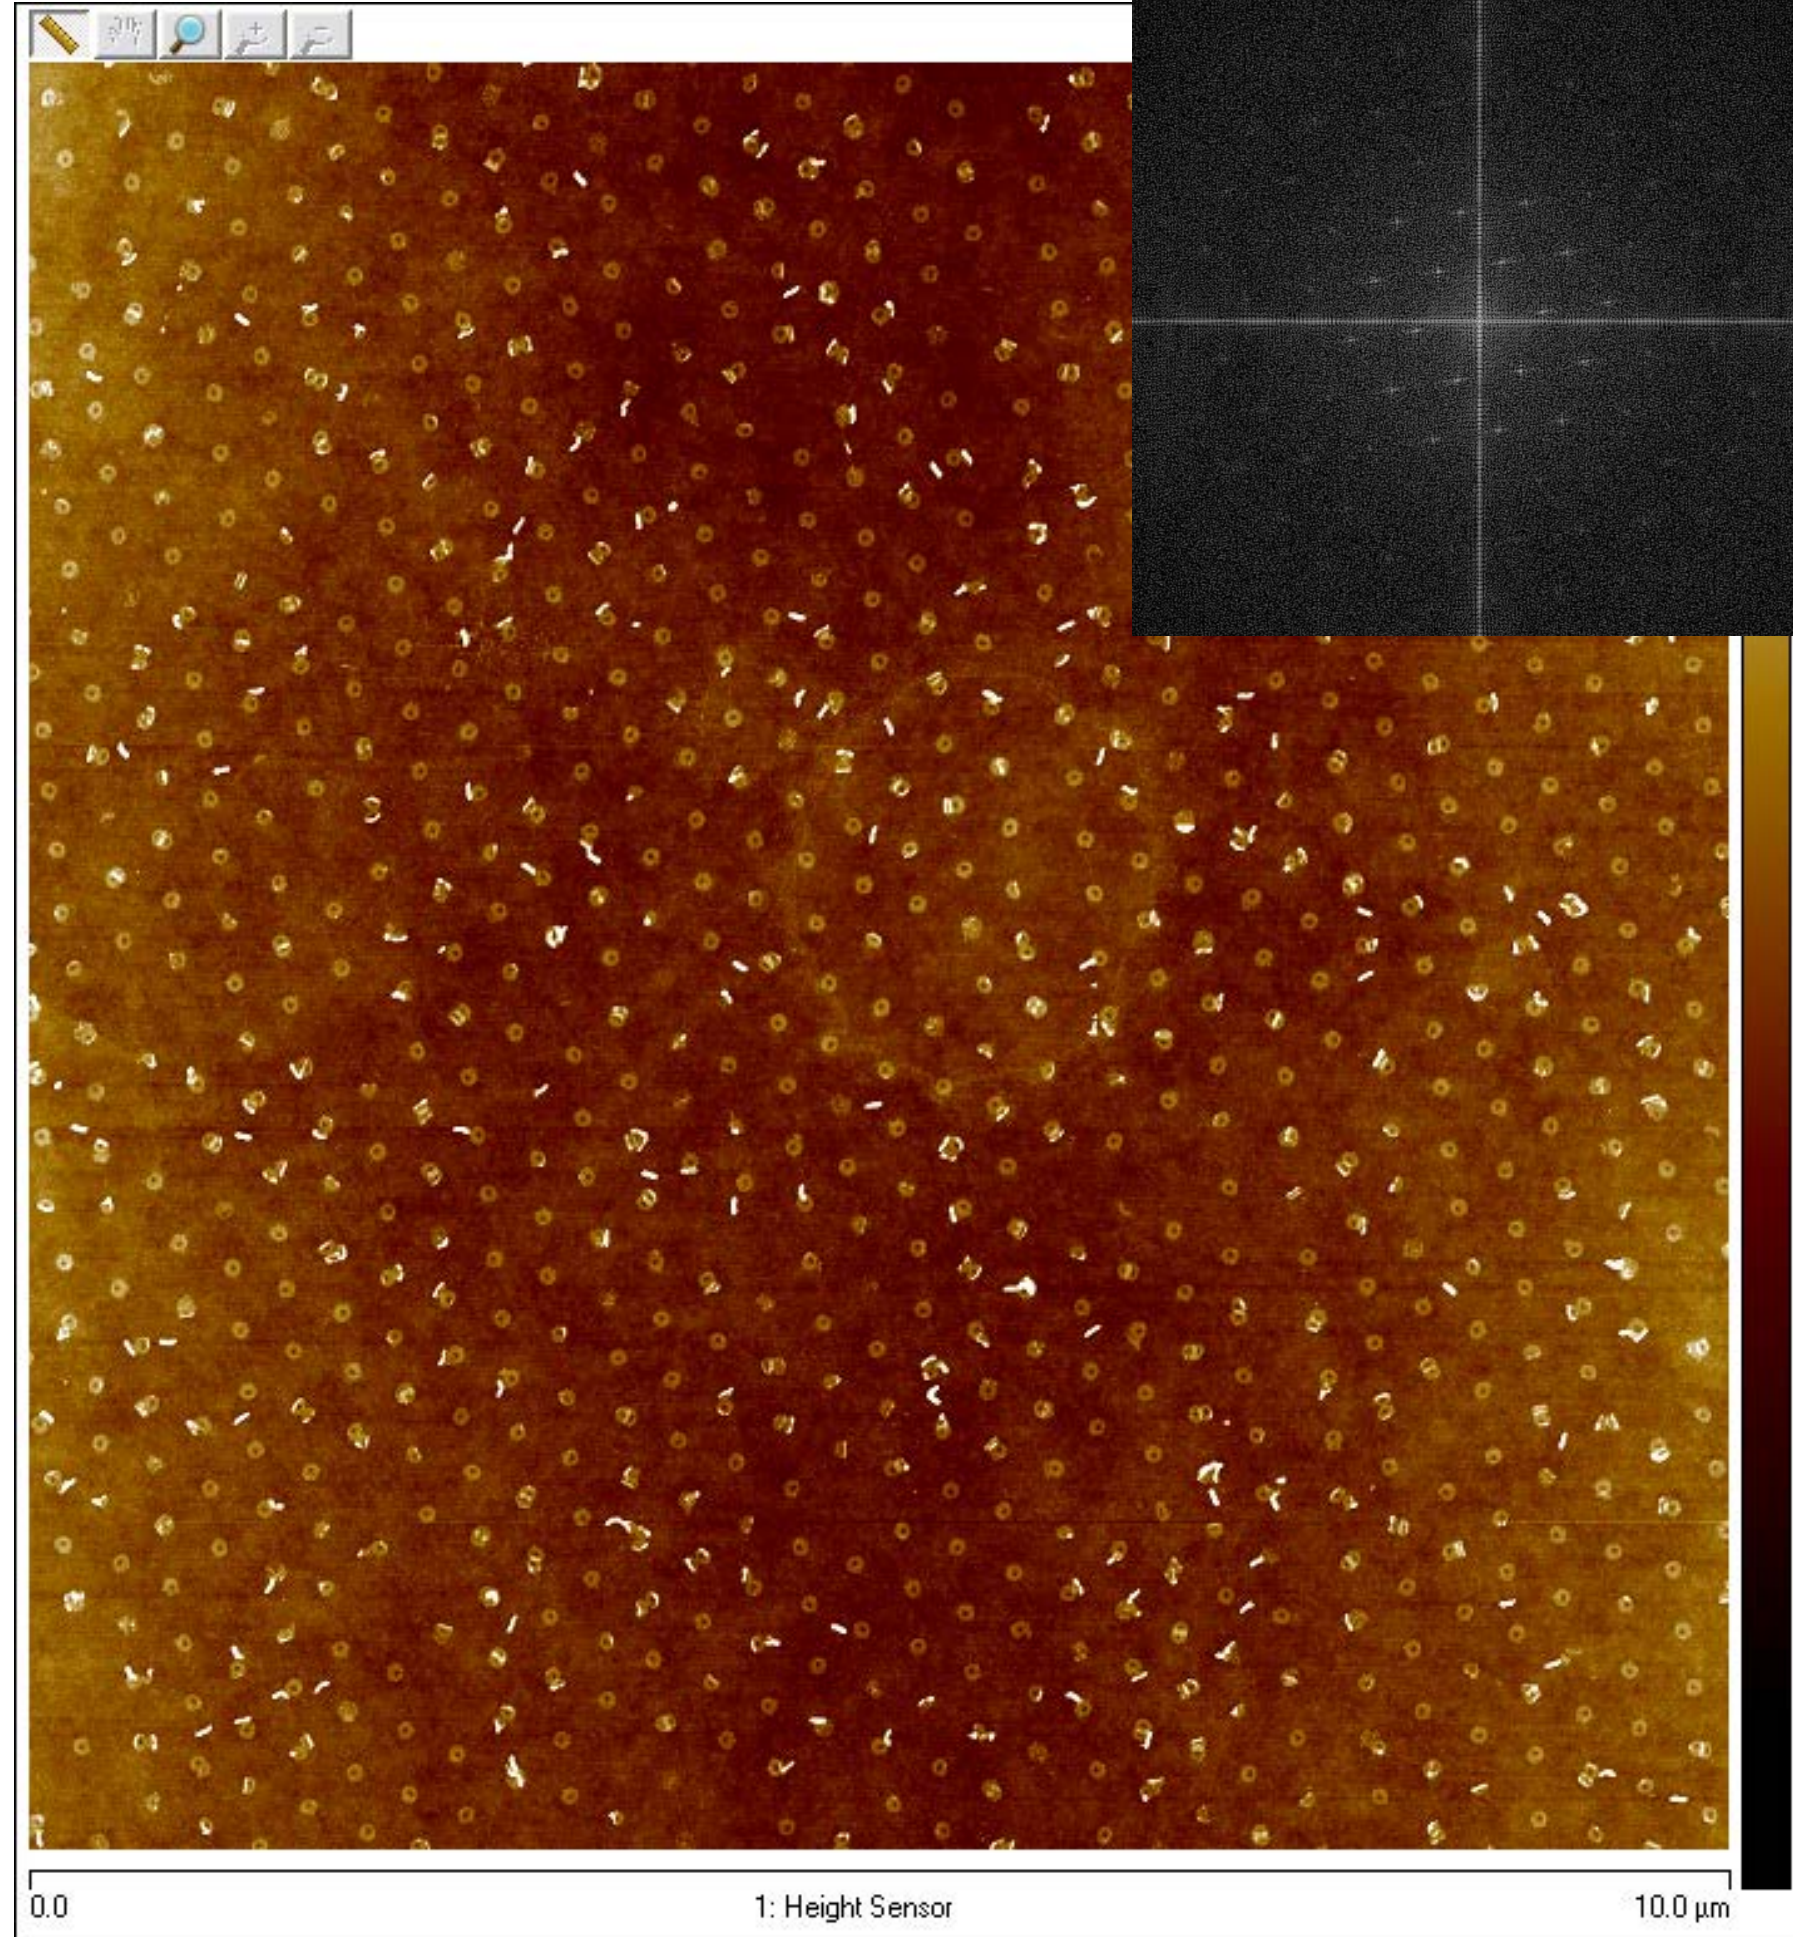

200 pM: 0- 8.45%, 1- 70%, 2- 21.55% (414 sites)



350 nm

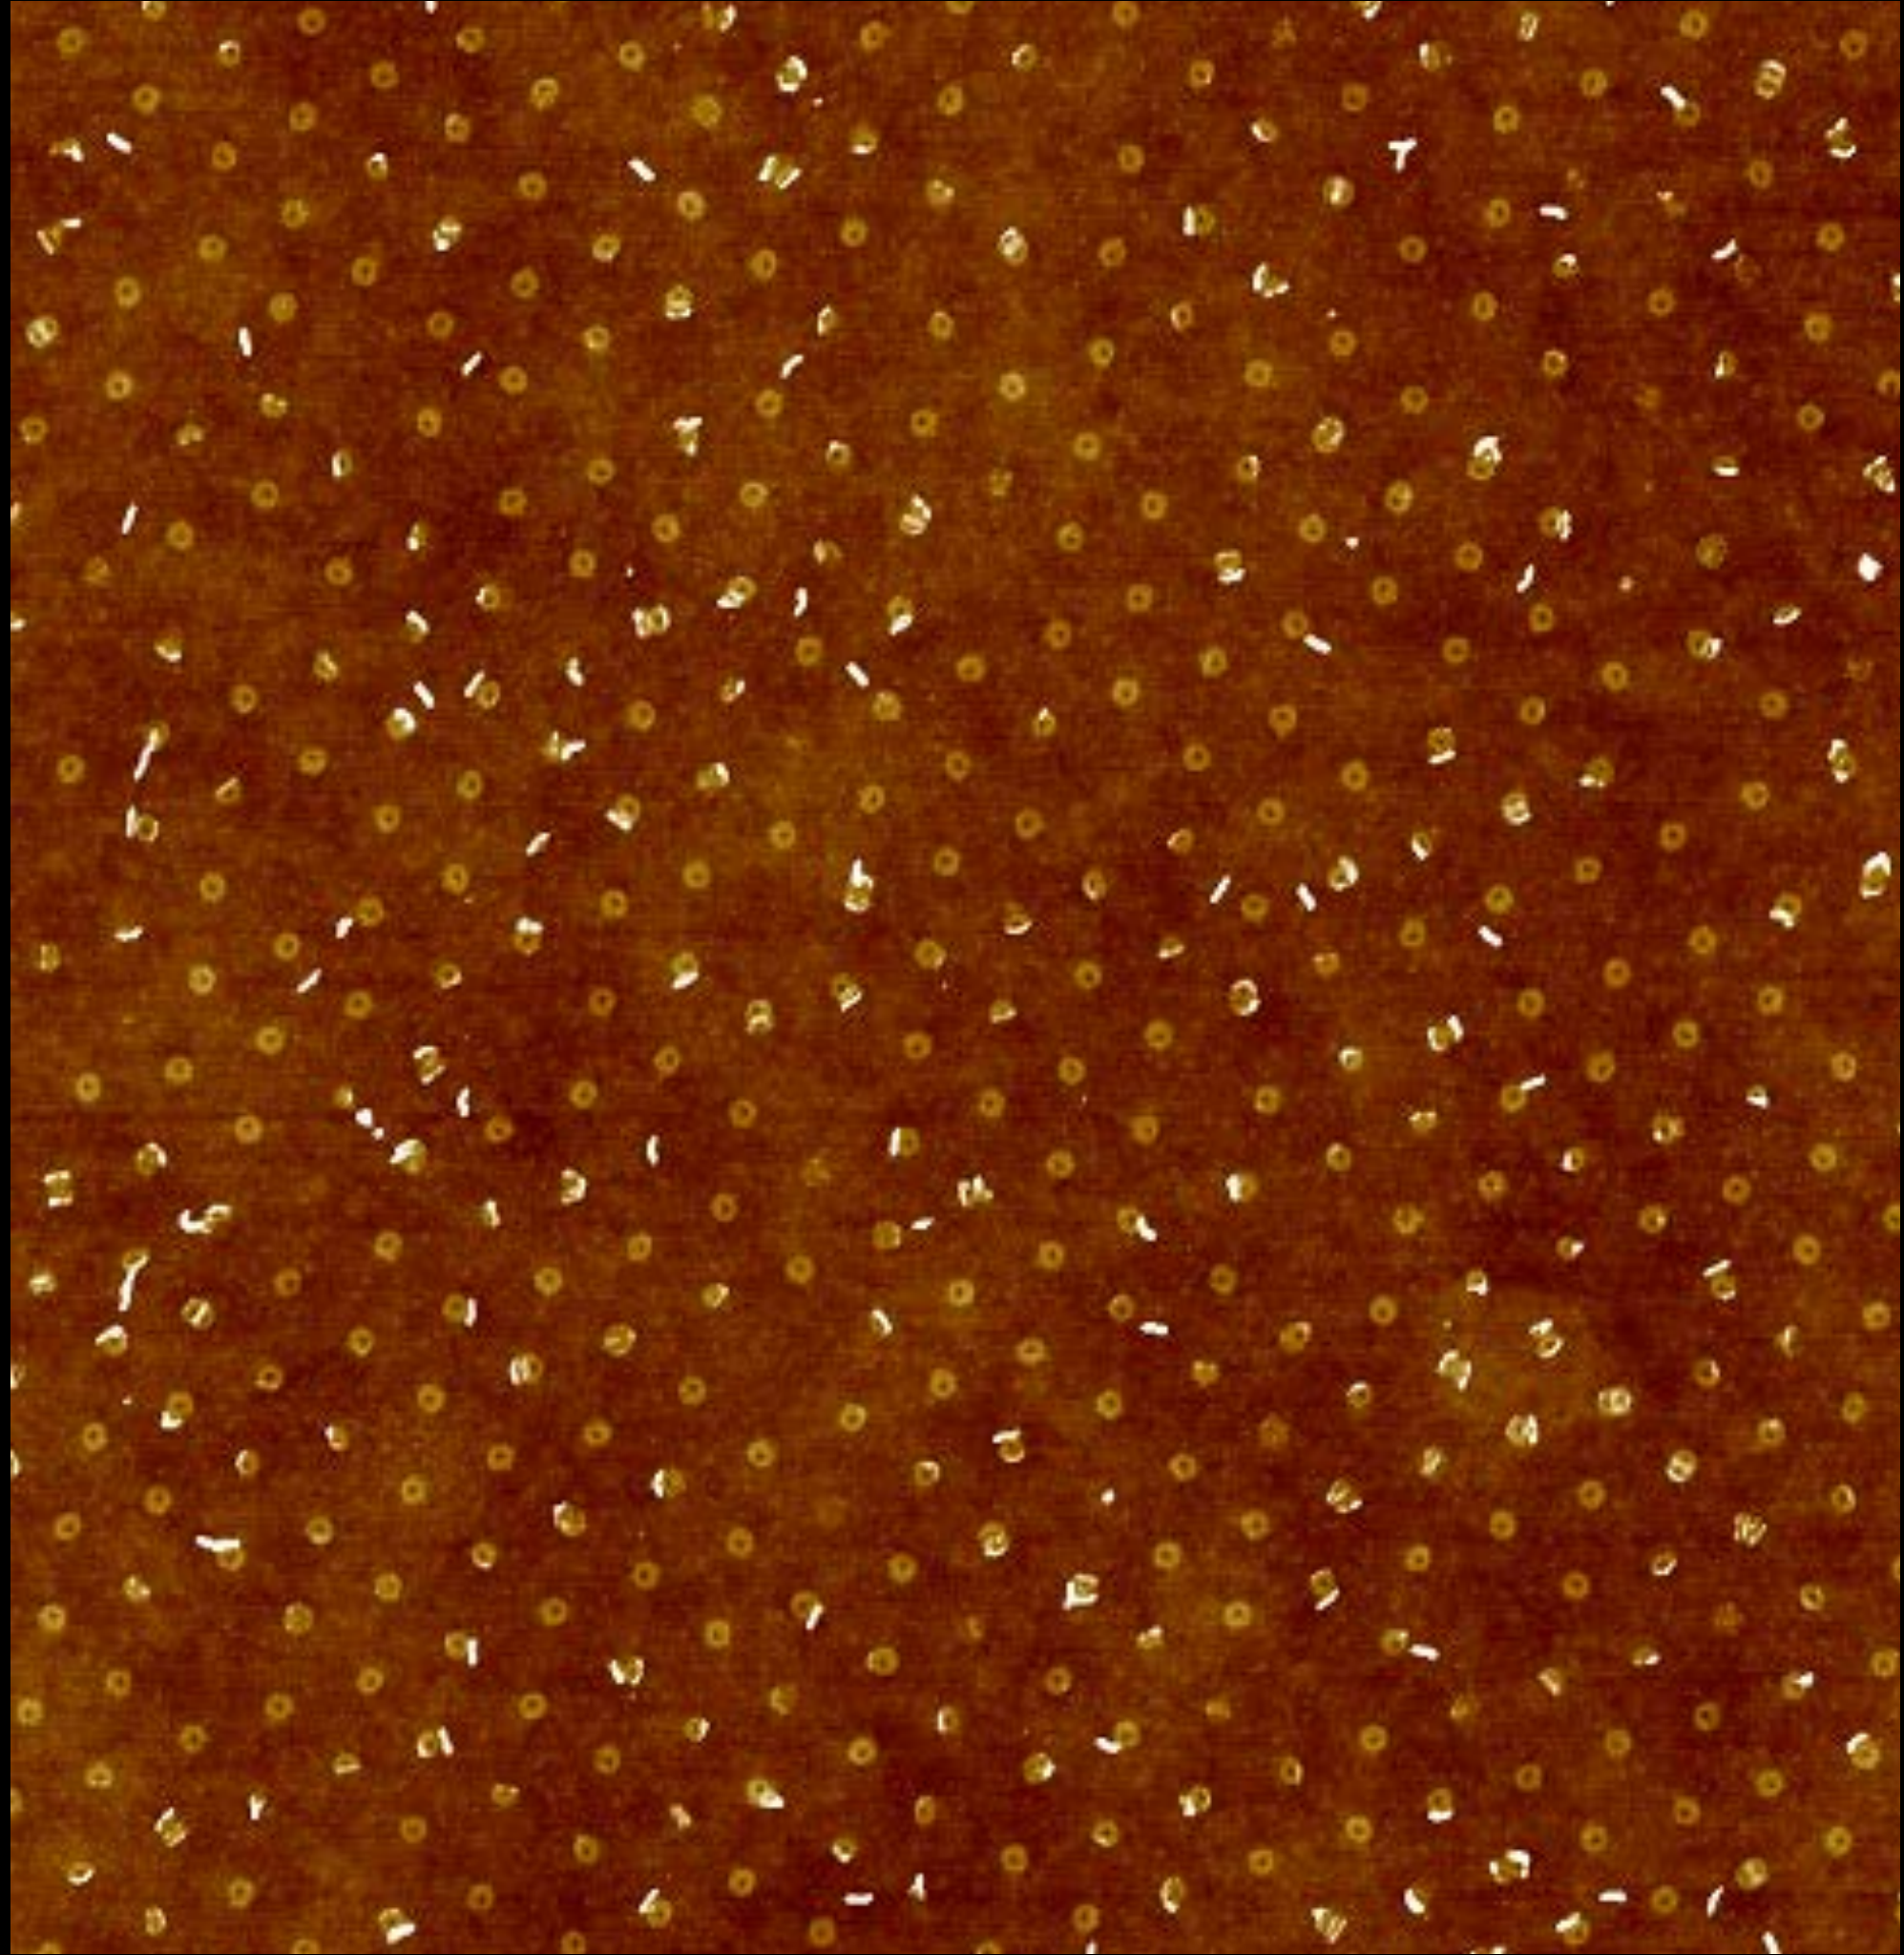



200 nm

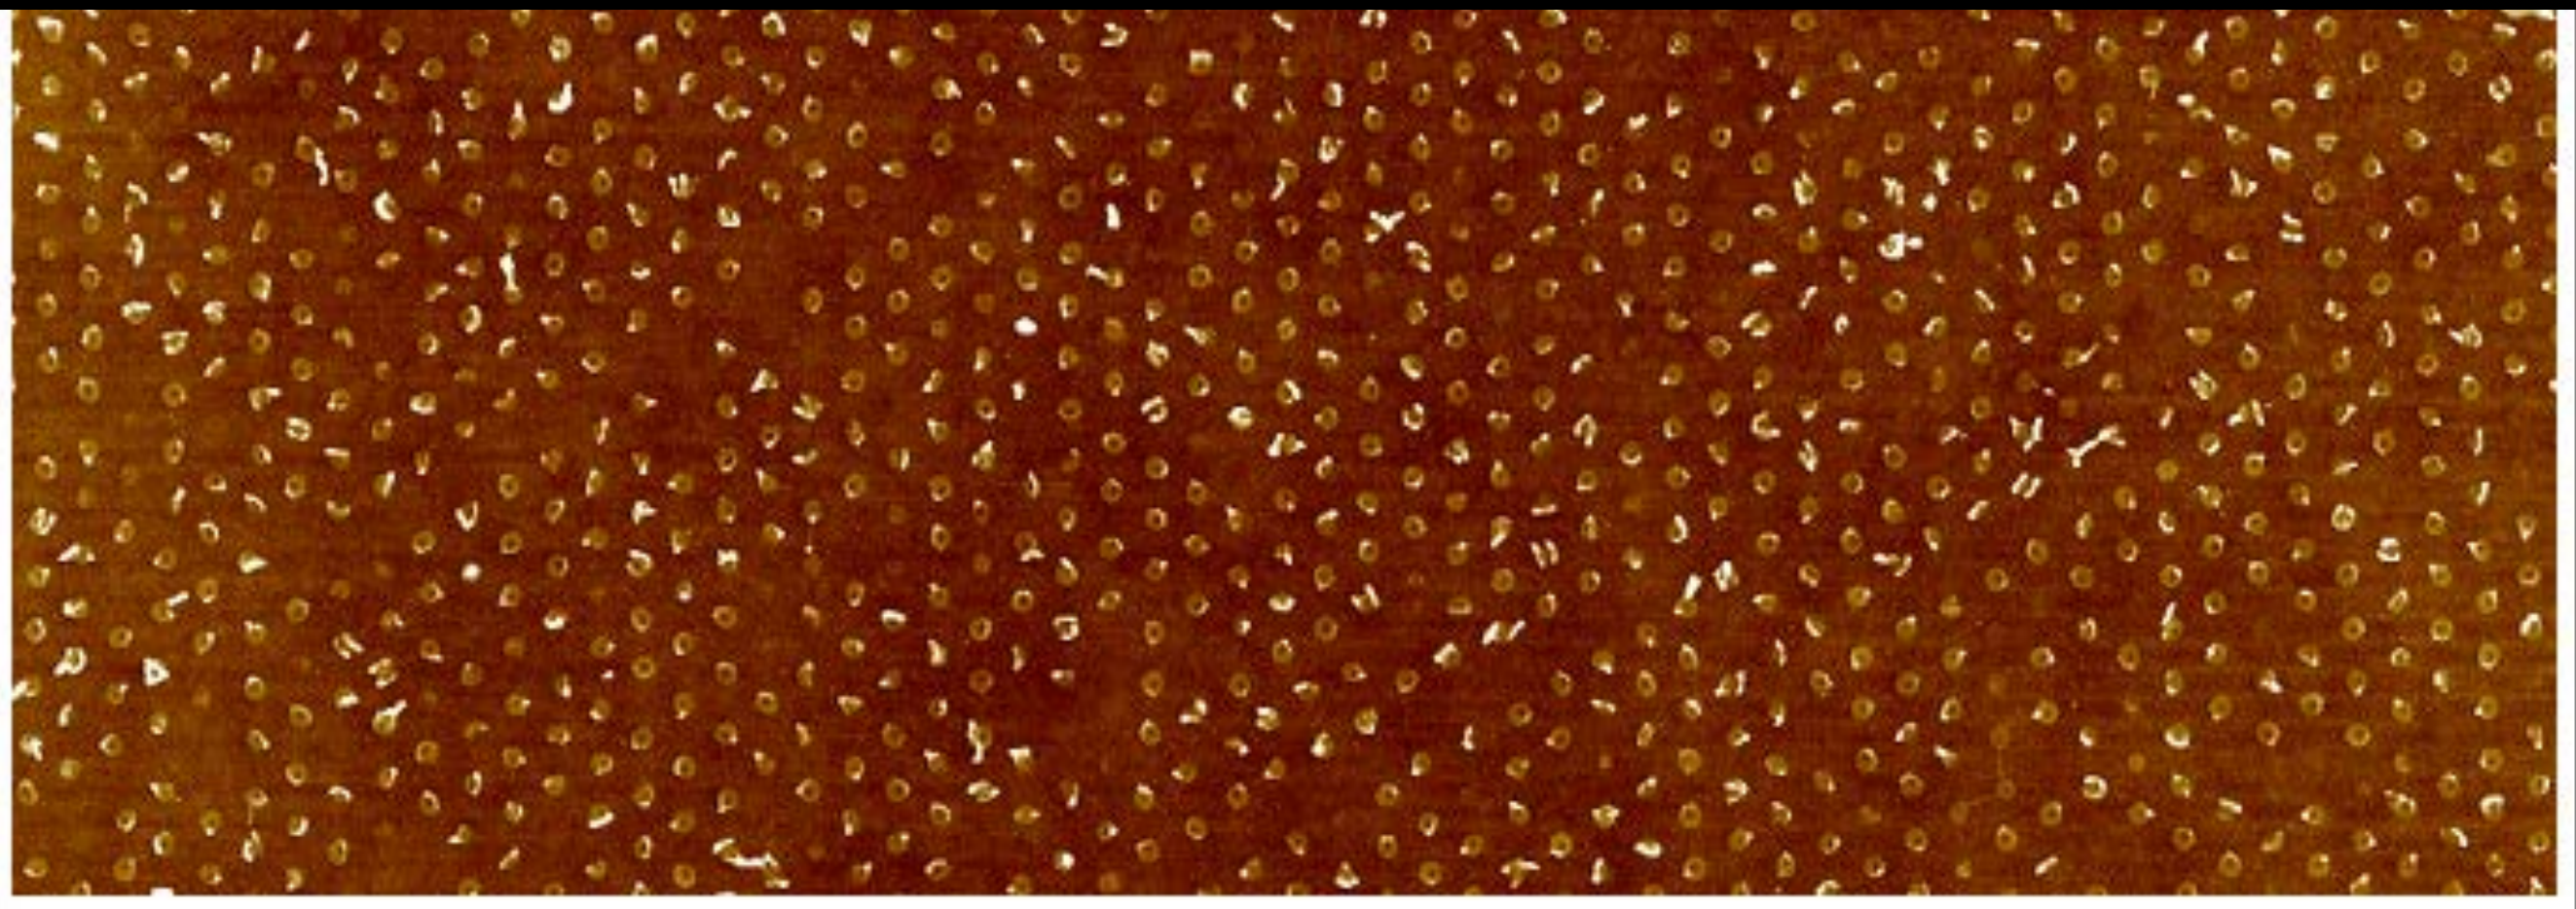



200 nm

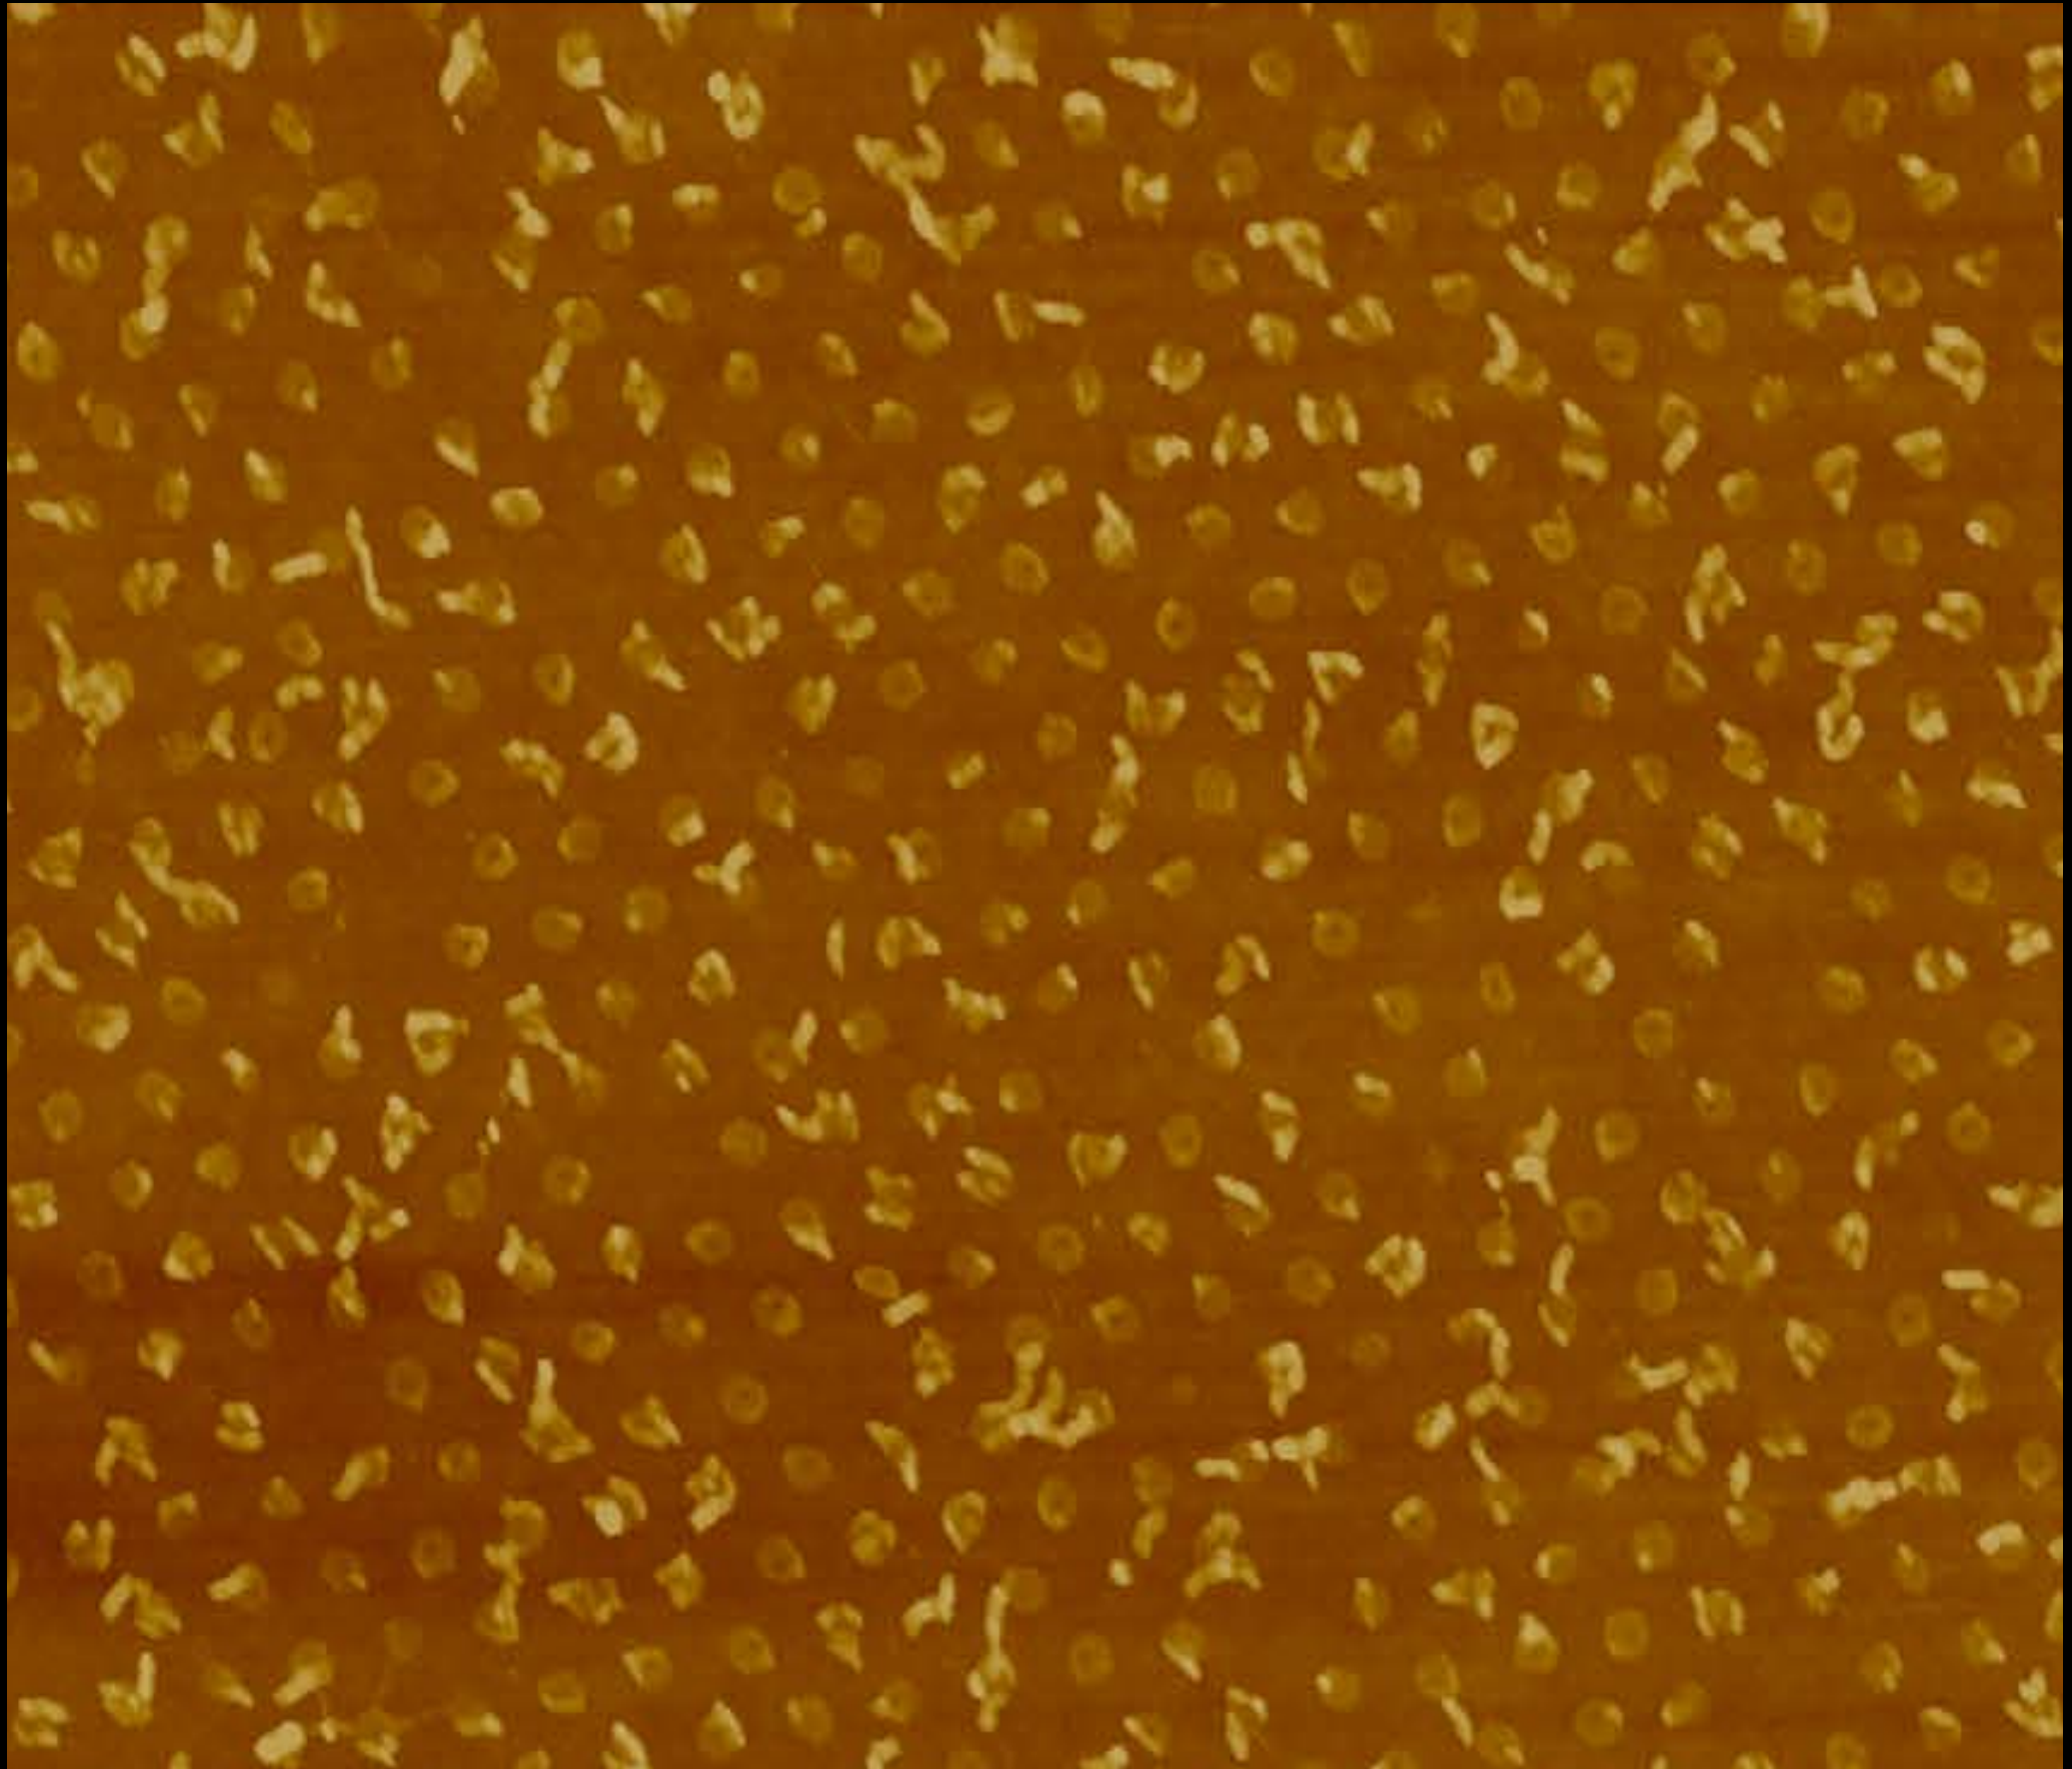



200 nm

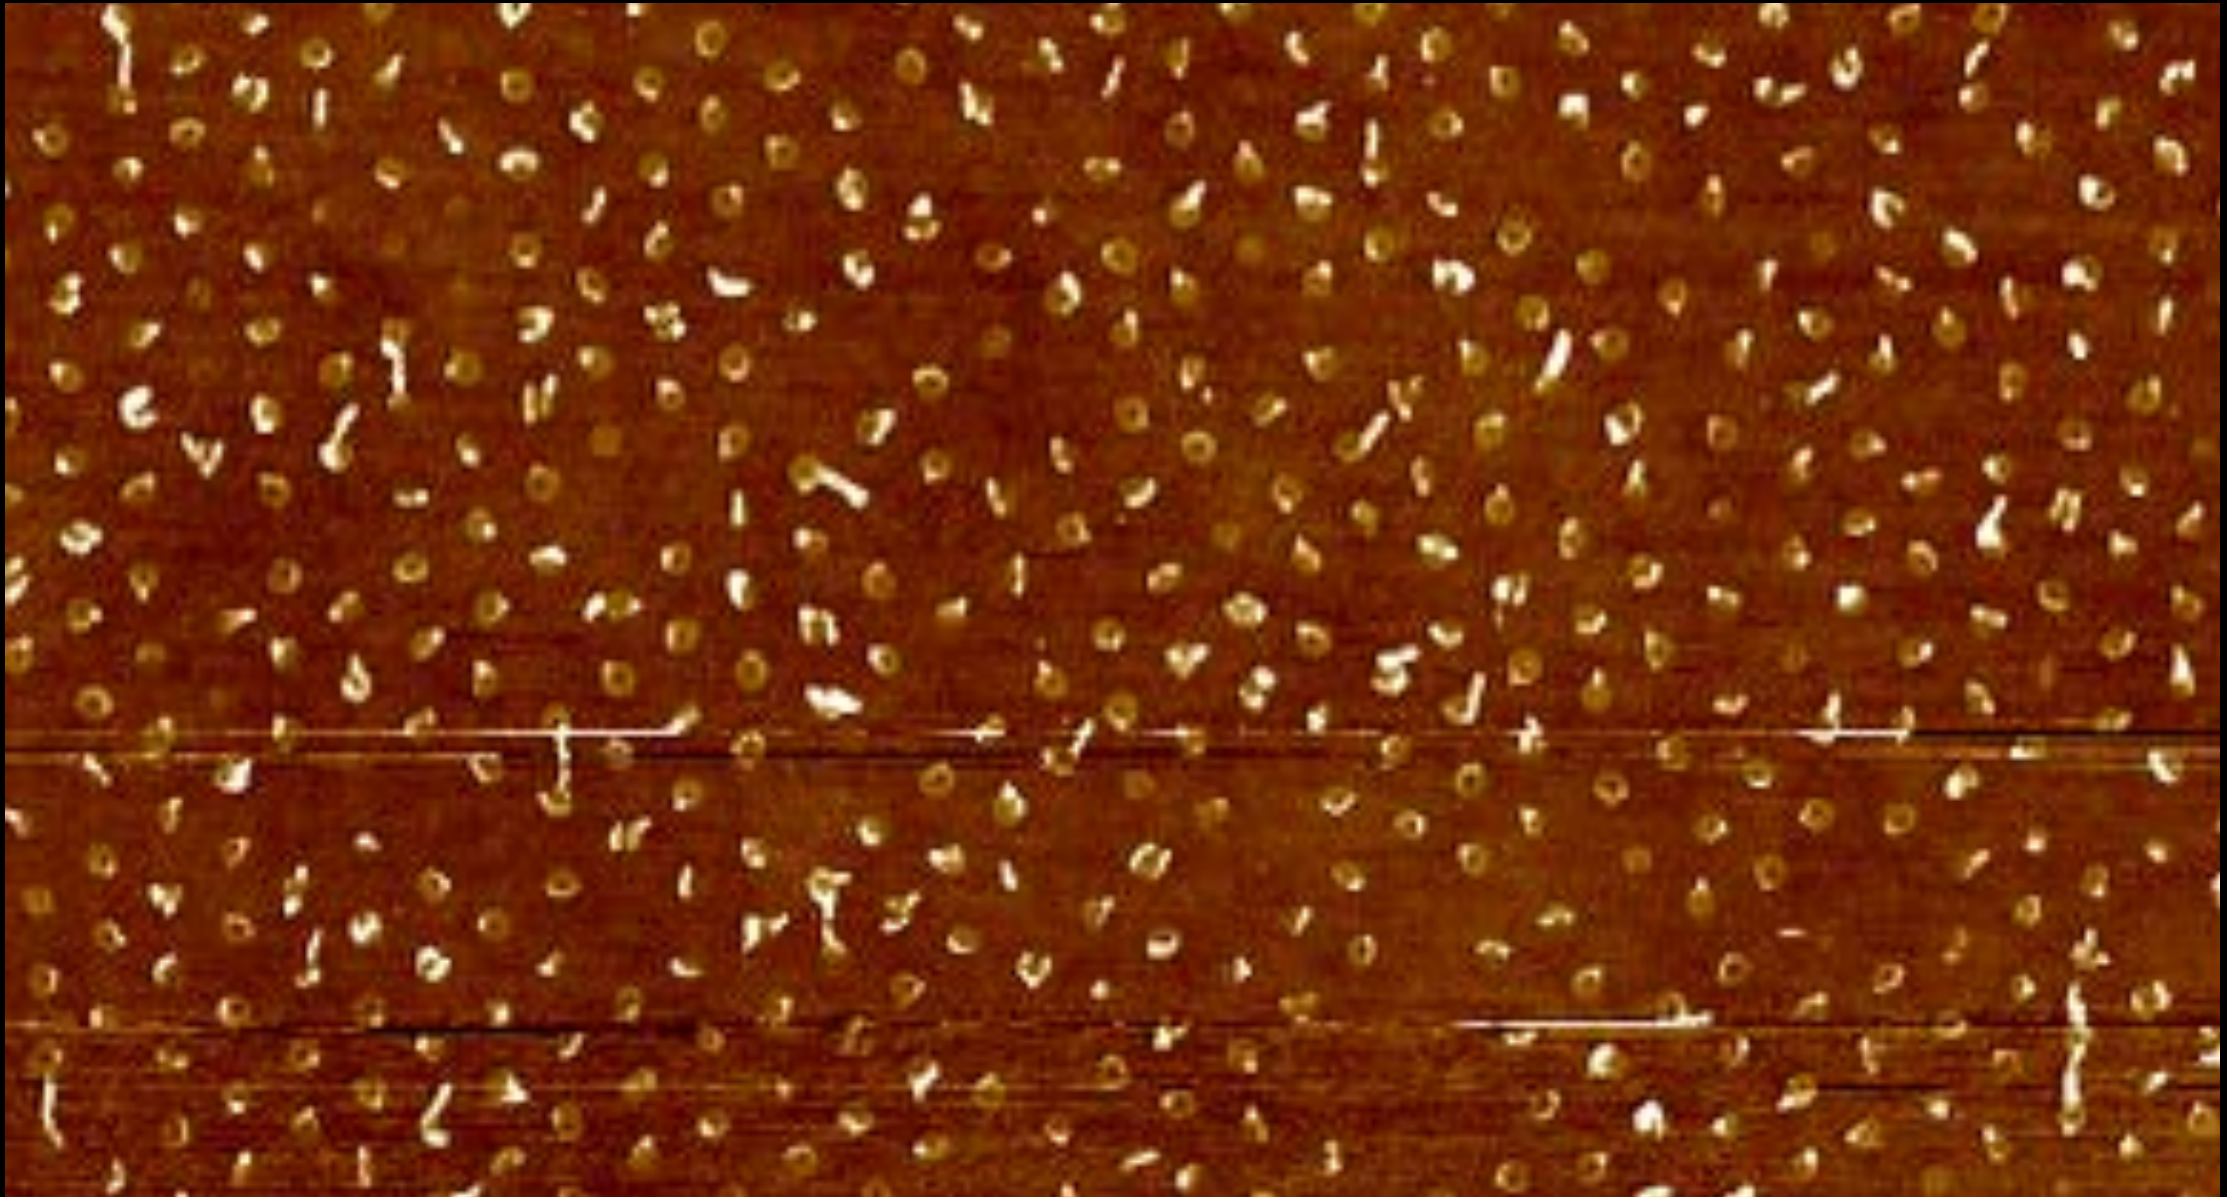

Supplement: Supplementary file 1 [file 28730703]
